# Supplementary material
Source: PubMed Central journal article supplement (PMC6454526)
Supplement: nqy107_supplemental_material.pdf [file nqy107_supplemental_material.pdf]

## Online Supporting Material

### OUTLINE

| <u>METHODS</u>                                                                             | PAGE |
|--------------------------------------------------------------------------------------------|------|
| SEARCH                                                                                     | 2    |
| VERIFICATION OF THE LINEAR ASSUMPTION<br>Between BMI and telomere length                   | 3    |
| ASSESSING HETEROGENEITY<br>Meta-regression and sources of heterogeneity (effect modifiers) | 4    |
| SENSITIVITY ANALYSES                                                                       | 5    |
| <u>RESULTS</u>                                                                             |      |
| VERIFICATION OF THE LINEAR ASSUMPTION<br>Between BMI and telomere length                   | 6    |
| ASSESSING HETEROGENEITY<br>Sex and age                                                     | 8    |
| Ethnicity and study design                                                                 | 9    |
| SENSITIVITY ANALYSES                                                                       | 10   |
| SUPPLEMENTAL FIGURE 1 FUNNEL PLOTS<br>OVERVIEW OF THE RESULTS OF THE META-ANALYSIS         | 11   |
| SUPPLEMENTAL TABLE 2<br>Beta estimates of all meta-analyses for absolute telomere length   | 12   |
| SUPPLEMENTAL TABLE 3<br>Beta estimates of all meta-analyses for relative telomere length   | 13   |
| SUPPLEMENTAL FIGURE 2 FOREST PLOTS<br>Legend                                               | 14   |
| Absolute telomere length (base pairs; bp)                                                  |      |
| Both sexes                                                                                 | 15   |
| Men                                                                                        | 20   |
| Women                                                                                      | 24   |
| Relative telomere length (T/S ratio)                                                       |      |
| Both sexes                                                                                 | 29   |
| Men                                                                                        | 35   |
| Women                                                                                      | 40   |
| References of Supplemental Figure 2 Forest plots                                           | 46   |
| STUDY PROTOCOL FOR PARTICIPATING PIs                                                       | 53   |

## Online Supporting Material

### METHODS

#### SEARCH

Search: Telomere\* and ("Obesity"[Mesh] OR "Adiposity"[Mesh] OR "Overweight"[Mesh] OR "Body Constitution"[Mesh] OR "Body Composition"[Mesh] OR "Body Weight"[Mesh] OR "Body Mass Index"[Mesh] OR "Body Fat Distribution"[Mesh] OR "Waist-Hip Ratio"[Mesh] OR "Waist Circumference"[Mesh] OR "Obesity, Abdominal"[Mesh] OR "Body Weight"[Mesh] OR "Body Size"[Mesh] OR "Body Constitution"[Mesh] OR Obesity OR Adiposity OR Overweight OR "Body Constitution" OR "Body Constitutions" OR "Body Composition" OR "Body Compositions" OR "Body Weight" OR "Body Mass Index" OR BMI OR "Body Fat Distribution" OR "fat distribution" OR "body fat" OR "body fat weight" OR "fat weight" OR "Waist-Hip Ratio" OR WHR OR "Waist Circumference" OR "Obesity, Abdominal" OR "Abdominal Obesity" OR "Abdominal Obesity" OR "Central Obesity" OR "Obesity, Central" OR "Body Weight" OR "Body Size" OR "Body Constitution" OR "Diabetes Mellitus"[Mesh] OR "Diabetes Mellitus, Type 2"[Mesh] OR "Metabolic Syndrome X"[Mesh] OR "Insulin Resistance"[Mesh] OR "Hyperinsulinism"[Mesh] OR "Glucose Intolerance"[Mesh] OR "Hyperglycemia"[Mesh] OR "Diabetes Mellitus" OR "Diabetes Mellitus, Type 2" OR "Metabolic Syndrome X" OR "Insulin Resistance" OR "Hyperinsulinism" OR "Diabetes Mellitus, Non Insulin Dependent" OR "Diabetes Mellitus, Non-Insulin-Dependent" OR "Non-Insulin-Dependent Diabetes Mellitus" OR "Type 2 Diabetes Mellitus" OR "Diabetes Mellitus, Type II" OR NIDDM OR "Insulin Resistance Syndrome X" OR "Metabolic X Syndrome" OR "Dysmetabolic Syndrome X" OR "Metabolic Cardiovascular Syndrome" OR "glucose intolerance" OR "glucose intolerances" OR IGT OR "impaired glucose intolerance" OR hyperglycaemia OR hyperglycemia OR "Cardiovascular Diseases"[Mesh] OR "Myocardial Ischemia"[Mesh] OR "Acute coronary syndrome"[Mesh] OR "Angina Pectoris"[Mesh] OR "Coronary disease"[Mesh] OR "Coronary artery disease"[Mesh] OR "Myocardial Infarction"[Mesh] OR "Hypertension"[Mesh] OR "Cardiovascular" OR "Cardiovascular Diseases" OR "Cardiovascular Disease" OR "Myocardial Ischemia" OR "Myocardial Ischemias" OR "Ischemic Heart Disease" OR "Ischemic Heart Diseases" OR "Acute coronary syndrome" OR "Acute Coronary Syndromes" OR "Coronary Syndrome" OR "coronary Syndromes" OR "Angina Pectoris" OR "AP" OR "Coronary disease" OR "Coronary diseases" OR "Coronary Heart Disease" OR "Coronary Heart Diseases" OR "CHD" OR "Coronary artery disease" OR "Coronary artery diseases" OR "CAD" OR "Coronary Atherosclerosis" OR "Myocardial Infarction" OR "Myocardial Infarctions" OR "Myocardial Infarct" OR "Myocardial Infarcts" OR Hypertension OR "Cardiovascular aging" OR aging OR "Cohort Studies"[Mesh] OR cohort OR "Case-Control Studies"[Mesh] OR Case Control) Filters: Humans.

## Online Supporting Material

### **VERIFICATION OF THE LINEAR ASSUMPTION**

To evaluate the linear assumption between BMI and telomere length multilevel regression analyses were performed to account for the difference between the study samples by adding a random intercept to the model. Models in which a quadratic term for BMI was included were compared to the models without a quadratic term for BMI by Akaike information criterion (AIC). Either absolute telomere length (bp) or relative telomere length (T/S ratio) was considered as the outcome measure. For these analyses the raw data provided by the PIs could be analysed.

## Online Supporting Material

### ASSESSING HETEROGENEITY

#### Meta-regression and sources of heterogeneity (effect modifiers)

Statistical heterogeneity between studies was estimated by  $I^2$  statistics<sup>25,26</sup> for each of the twelve meta-analyses. Low heterogeneity was indicated by  $I^2$  up to 25%, medium heterogeneity by 25-50%, and high heterogeneity by  $> 50%$ <sup>26</sup>.

To confirm the expected differences in association for age and sex, meta-regression analysis was performed with age and sex as potential effect modifiers. Age was divided into three age categories (“young”  $\geq 18$  and  $\leq 60$  years, “middle”  $> 60$  and  $\leq 75$ , “old”  $> 75$  years) and also in two (“young”  $\geq 18$  and  $\leq 60$  years vs. “middle and old”  $> 60$  years) age categories.

Other potential sources of heterogeneity at study level (effect modifiers) were investigated by meta-regression analysis. The following effect modifiers were considered: (1) general factors: ethnicity (percentage of the total study sample, i.e. percentage of population being white, African American, Native American, Asian, and Hispanic), study design, level at which the data was provided (i.e. raw data or summary statistics), (2) factors related to telomere length measurement: cell type in which telomere length was determined, technique of telomere length measurement, storage of DNA, and, whether absolute telomere length was estimated from T/S ratio or was measured directly and (3) factors related to BMI: assessment of BMI based on self-report or measured height and weight. When heterogeneity for a given source was observed ( $p < 0.05$ ), stratified analyses were performed.

## Online Supporting Material

### **SENSITIVITY ANALYSES**

To evaluate whether the summary estimates for BMI were affected by individual studies, we performed outlier analyses by omitting one study at a time.

To evaluate whether studies with large sample sizes ( $n > 5000$ ) affected the summary estimates, analyses were repeated without these large studies. However, only the Copenhagen General population Study (45,069 individuals) and the PREVEND STUDY (7,991 INDIVIDUALS) and NHANES study (7,348 individuals) had sample sizes of that magnitude.

The analyses with absolute telomere length as the outcome were repeated without the three studies that used the relative telomere length to estimate the absolute telomere length. In addition, analyses were stratified by method of measurement of telomere length (Southern blot vs. q-PCR).

In a sensitivity analysis a cut off value of 90% was used to classify a sample of a particular ethnicity. When at least 90% of the individuals of a sample was of a single ethnicity (e.g. white, African American, Native American, Asian, Hispanic) the sample was classified as a sample of a particular ethnicity, when no ethnicity constitutes 90% of the sample, the sample was classified as a mixed sample.

## RESULTS

### VERIFICATION OF THE LINEAR ASSUMPTION

#### Absolute telomere length

In the multilevel regression analysis with absolute telomere length (base pairs;bp) as outcome measure eleven study populations were included: Bogalusa, India CURES Study, Campania, Asklepios, COPD, Crete, Zutphen, War Twins, Businessmen Study (HBS), ZTL2008, Venado Tuerto 2 and RPCI.

For absolute telomere length models considering a linear association did not differ significantly from models with a non-linear association, based on AIC. The most parsimonious model is preferred and one can conclude that the association between BMI and telomere length can be considered linear (Table 1).

#### Relative telomere length

In the multilevel regression analysis with relative telomere length (T/S ratio) as outcome measure thirteen study populations were included: MONICA, MDCC, EARSII, Ashkenazi, Warsaw, CAS, PATH40, PATH60, Italy alcohol controls, Ecran, Mayo, HBCS, Nutrition and Exercise for Women (NEW) Study, PRT, UMS, YMCA, Kyiv, GAHR2, UMED telomere trial, RPE, and the Sweden Mindfulness Study.

For relative telomere length conclusions considering a linear relationship between BMI and telomere length are not easy to draw. Forty three percent of the PIs provided raw data, which consisted of only 15% of the total individuals (11,710 / 76,456 individuals). The telomere length of the YMCA study sample (n=1,139) was long (mean TS ratio of 4563.50 (SD 1001.72)) as compared to all other study samples (n=10,571; mean TS ratio of 1050.47 (SD 739.29)). Also the YMCA study was very young (mean age 19.03 years (SD 3.47)) as compared to all other study samples (mean age 52.50 years (SD 16.33)).

It turned out that models considering a linear association differed significantly from models with a non-linear association, based on AIC. However, this was completely explained by the contribution of the

## Online Supporting Material

YMCA study. In Supplemental Table 1 the values of the model fit (AIC) and estimates and standard error (SE) of the multilevel regression analyses with and without the YMCA study sample are presented.

Based on the raw data in our possession one can conclude that the association between BMI and telomere length can be considered linear, at least at older age. However, because a subset was used for these analyses and not the complete data set, it is possible that lack of power could also be a reason for not showing a non-linear association.

### Supplemental Table 1 Association between BMI and telomere length based on multilevel regression analysis

|                                                      |         | Unadjusted |          |       | Adjusted for sex and age |           |          |       |         |
|------------------------------------------------------|---------|------------|----------|-------|--------------------------|-----------|----------|-------|---------|
|                                                      |         | Model fit  | Estimate | SE    | p-value                  | Model fit | Estimate | SE    | p-value |
| Absolute telomere length (base pairs; bp) as outcome |         |            |          |       |                          |           |          |       |         |
| Model 1                                              | BMI     | 111,886.9  | -70.42   | 50.04 | 0.16                     | 111,748.4 | -32.47   | 50.17 | 0.51    |
|                                                      | BMI*BMI |            | 0.99     | 0.83  | 0.23                     |           | 0.47     | 0.83  | 0.57    |
| Model 2                                              | BMI     | 111,886.3  | -11.69   | 8.52  | 0.17                     | 111,746.8 | -4.19    | 8.49  | 0.62    |
| T/S ratio as outcome YMCA study sample included      |         |            |          |       |                          |           |          |       |         |
| Model 1                                              | BMI     | 182,538.2  | -20.42   | 7.06  | 0.004                    | 182,517.5 | -16.00   | 7.13  | 0.03    |
|                                                      | BMI*BMI |            | 0.31     | 0.12  | 0.009                    |           | 0.24     | 0.12  | 0.04    |
| Model 2                                              | BMI     | 182,543.0  | -2.21    | 1.29  | 0.07                     | 182,519.6 | -1.76    | 1.29  | 0.17    |
| T/S ratio as outcome YMCA study sample excluded      |         |            |          |       |                          |           |          |       |         |
| Model 1                                              | BMI     | 162,933.5  | -13.91   | 6.69  | 0.04                     | 162,911.3 | -9.49    | 6.76  | 0.16    |
|                                                      | BMI*BMI |            | 0.21     | 0.11  | 0.05                     |           | 0.15     | 0.11  | 0.18    |
| Model 2                                              | BMI     | 162,935.3  | -1.07    | 1.21  | 0.38                     | 162,911.1 | -0.66    | 1.21  | 0.58    |

Legend: the unit of the estimate and standard error (SE) with T/S ratio as outcome are in  $10^{-3}$ .

## Online Supporting Material

### HETEROGENEITY

#### Sex and age

With absolute telomere length as the outcome, age was an effect modifier in the meta-regression analyses in women (beta= 3.22 (SE 1.54; 95%C.I. 0.12, 6.32; p=0.04). When age was divided into two age groups, age was an effect modifier in the overall association and in women (overall: beta = 5.08 (SE 1.68; 95%C.I. 1.73, 8.43; p= 0.004); women: beta= 6.10 (SE 1.76; 95%C.I. 2.56, 9.64; p= 0.001).

Sex was never an effect modifier.

With relative telomere length as the outcome, age was an effect modifier in overall analyses and in women (overall: beta=  $1.56 \times 10^{-3}$  (SE  $0.65 \times 10^{-3}$ ; 95%C.I.  $0.26 \times 10^{-3}$ ,  $2.85 \times 10^{-3}$ ; p= 0.02); women: beta=  $1.82 \times 10^{-3}$  (SE  $0.53 \times 10^{-3}$ ; 95%C.I.  $0.77 \times 10^{-3}$ ,  $2.86 \times 10^{-3}$ ; p=0.001). If age was divided into two categories age was an effect modifier in overall analyses and in women (overall: beta=  $1.94 \times 10^{-3}$  (S.E.  $0.87 \times 10^{-3}$ ; 95%C.I.  $0.22 \times 10^{-3}$ ,  $3.66 \times 10^{-3}$ ; p=0.03); women: beta= $2.26 \times 10^{-3}$  (SE  $0.69 \times 10^{-3}$ ; 95%C.I.  $0.89 \times 10^{-3}$ ,  $3.62 \times 10^{-3}$ ; p= 0.001).

Sex was never an effect modifier.



## Online Supporting Material

### Ethnicity

With absolute telomere length as the outcome, ethnicity (white, African American) was an effect modifier in the meta-regression analyses in the young study sample (both sexes white:  $\beta = -9.05$  (SE 3.44; 95% C.I. -16.21, -1.89;  $p = 0.02$ ); both sexes African American:  $\beta = 10.80$  (SE 3.55; 95% C.I. 3.43, 18.18;  $p = 0.006$ ).

Ethnicity (Asian) was also an effect modifier in the meta-regression analyses in the middle aged study sample (both sexes Asian:  $\beta = 71.36$  (SE 4.03; 95% C.I. 17.34, 125.68;  $p = 0.01$ ).

With relative telomere length as the outcome, ethnicity (African American, Asian) was an effect modifier in the analyses of total study sample (both sexes African American:  $\beta = 3.56$  (SE 1.68; 95% C.I. 0.18, 6.93;  $p = 0.04$ ); both sexes Asian:  $\beta = 1.88 \times 10^{-3}$  (SE  $0.86 \times 10^{-3}$ ; 95% C.I.  $0.17 \times 10^{-3}$ ,  $3.60 \times 10^{-3}$ ;  $p = 0.03$ ). Ethnicity (white, native Americans) was also an effect modifier in the meta-regression analyses in the middle aged study sample (both sexes white (Monte Carlo permutation:  $p < 0.001$ ); both sexes Native American:  $\beta = 3.44 \times 10^{-3}$  (SE  $1.69 \times 10^{-3}$ ; 95% C.I.  $0.05 \times 10^{-3}$ ,  $6.85 \times 10^{-3}$ ;  $p = 0.05$ ); women white:  $\beta = -4.94 \times 10^{-3}$  (SE  $1.29 \times 10^{-3}$ ; 95% C.I.  $-7.54 \times 10^{-3}$ ,  $-2.34 \times 10^{-3}$ ;  $p < 0.001$ ); women Native Americans:  $\beta = 5.12 \times 10^{-3}$  (SE  $1.83 \times 10^{-3}$ ; 95% C.I.  $1.41 \times 10^{-3}$ ,  $8.82 \times 10^{-3}$ ;  $p = 0.008$ ).

Finally, cell type was an effect modifier in the old study sample (both sexes overall:  $\beta = 70.04 \times 10^{-3}$  (SE  $33.08 \times 10^{-3}$ ; 95% C.I.  $2.17 \times 10^{-3}$ ,  $137.91 \times 10^{-3}$ ;  $p = 0.04$ ); women overall:  $\beta = 69.90 \times 10^{-3}$  (SE  $33.08 \times 10^{-3}$ ; 95% C.I.  $1.77 \times 10^{-3}$ ,  $138.04 \times 10^{-3}$ ;  $p = 0.05$ ), but only one study (Ecran) did not use leucocytes.

Since ethnicity was identified as an effect modifier, all analyses were stratified by ethnicity in addition to the originally planned analyses. Although population sizes of studies with non-white populations were small and their results should be interpreted with caution, these populations were included for completeness. Analyses were not stratified by cell type, as cell type was only an effect modifier in the old study sample and within this sample only one study did not use leucocytes. No other sources of effect modifiers were discovered (all  $p$ -values  $> 0.05$ ).

## Online Supporting Material

### **SENSITIVITY ANALYSES**

Omitting one study at a time resulted in no substantial change of the summary estimate. After exclusion of the large Copenhagen General Population Study the estimate of absolute telomere length change became -3.94 bp per BMI unit (95%C.I. -5.21 to -2.66) instead of -3.99 (95%C.I. -5.17 to -2.81) and after excluding the large NHANES study the estimate of the relative telomere length change per unit BMI remained the same  $-1.58 \times 10^{-3}$  units T/S ratio (95%C.I.  $-2.16 \times 10^{-3}$ ,  $-1.01 \times 10^{-3}$ ) instead of  $-1.58 \times 10^{-3}$  (95%C.I.  $-2.14 \times 10^{-3}$ ,  $-1.01 \times 10^{-3}$ ). And changed not substantial when excluding the large PREVEND study ( $\beta = -1.57 \times 10^{-3}$  (95%C.I.  $-2.12 \times 10^{-3}$ ,  $-1.01 \times 10^{-3}$ )).

Excluding both the NHANES study and the PREVEND study the estimate of the relative telomere length change per unit BMI did not change substantially  $-1.51 \times 10^{-3}$  units T/S ratio (95%C.I.  $-2.14 \times 10^{-3}$ ,  $-0.89 \times 10^{-3}$ ).

Repeating the analysis with absolute telomere length as the outcome without the three studies that used the relative telomere length to estimate the absolute telomere length yielded almost the same summary estimate which was -4.12 bp (95%C.I. -5.77, -2.47).

Stratified analysis by method of measurement yielded an estimate of -4.65 bp (95%C.I. -6.76 to -2.54) for the Southern blots method and -3.56 bp (95%C.I. -5.01, -2.11) for q-PCR method.

If, in the case of absolute telomere length, a cut off value of 90% was chosen to define a population as white, resulting in one study (Bogalusa) omitted, the summary estimate changed from -4.36 to -4.45 bp (95%C.I. -6.05, -2.86). For relative telomere length the summary estimate changed from  $-1.87 \times 10^{-3}$  to  $-1.88 \times 10^{-3}$  units T/S ratio (95%C.I.  $-2.41 \times 10^{-3}$ ,  $-1.35 \times 10^{-3}$ ) with three studies (Sister Study I (Vanguard sample) and Boiler workers and NEW study) omitted.

**SUPPLEMENTAL FIGURE 1 FUNNEL PLOTS**

Funnel plot for absolute telomere length (base pairs; bp) of the total pooled population

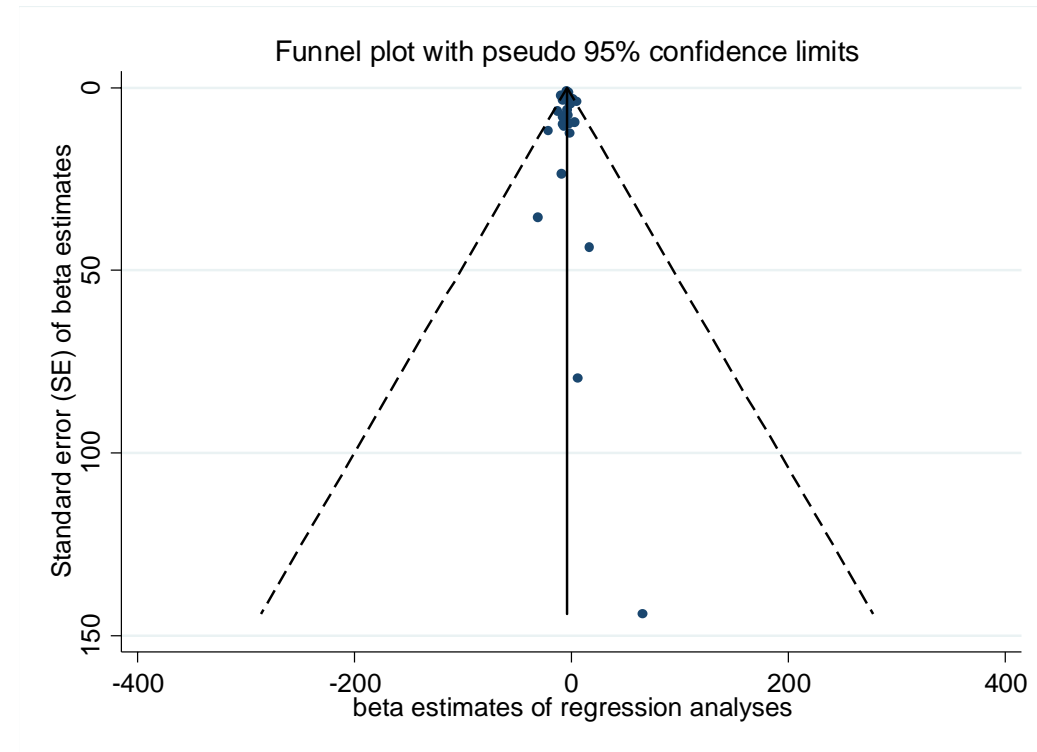

Funnel plot for relative telomere length (T/S ratio) of the total pooled population

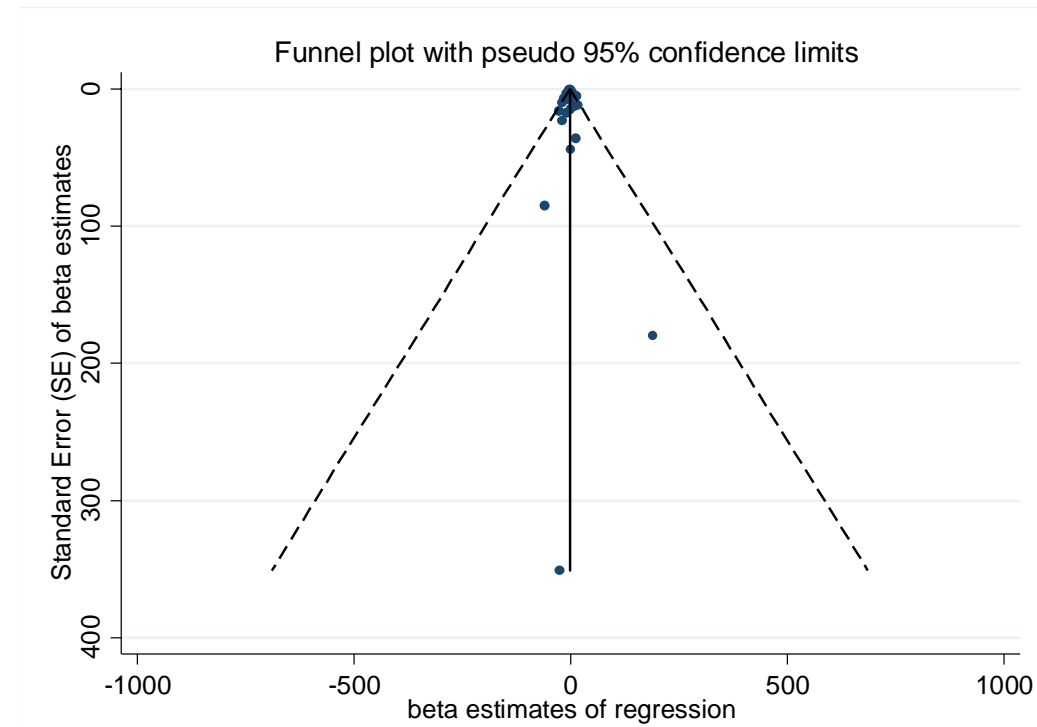

**Supplemental Table 2 Summary of the beta estimates (regression coefficients) from the meta-analysis of the association between BMI and telomere length as outcome and absolute telomere length (base pairs (bp)) as independent variable**

|                                   | All together (total pooled sample)* |              |                     |                    | "Young" pooled sample (18-60 yr) ** |              |                      |                    | "Middle " pooled sample (61-75 yr) ** |               |                      |                    | "Old" pooled sample (> 75 yr) ** |              |                      |                    |
|-----------------------------------|-------------------------------------|--------------|---------------------|--------------------|-------------------------------------|--------------|----------------------|--------------------|---------------------------------------|---------------|----------------------|--------------------|----------------------------------|--------------|----------------------|--------------------|
|                                   | N                                   | estimate     | 95%C.I.             | I <sup>2</sup> (%) | N                                   | estimate     | 95%C.I.              | I <sup>2</sup> (%) | N                                     | estimate      | 95%C.I.              | I <sup>2</sup> (%) | N                                | estimate     | 95%C.I.              | I <sup>2</sup> (%) |
| <b>Both sexes (Men and Women)</b> |                                     |              |                     |                    |                                     |              |                      |                    |                                       |               |                      |                    |                                  |              |                      |                    |
| Overall                           | 29                                  | <b>-3.99</b> | <b>-5.17, -2.81</b> | 0.6                | 23                                  | <b>-7.67</b> | <b>-10.03, -5.31</b> | 31.2               | 22                                    | -1.65         | -4.41, 1.11          | 19.7               | 16                               | <b>-5.89</b> | <b>-10.41, -1.37</b> | 5.3                |
| white                             | 21                                  | <b>-4.36</b> | <b>-5.87, -2.85</b> | 11.3               | 15                                  | <b>-8.77</b> | <b>-10.42, -7.12</b> | 0.0                | 15                                    | <b>-2.06</b>  | <b>-4.06, -0.06</b>  | 0.0                | 13                               | <b>-6.97</b> | <b>-12.29, -1.64</b> | 15.4               |
| African Am.                       | 2                                   | 0.86         | -4.75, 6.46         | 0.0                | 2                                   | 0.96         | -5.51, 7.43          | 1.2                | 2                                     | 4.36          | -7.25, 15.97         | 0.0                | 1                                | 74.70        | -76.02, 225.42       |                    |
| Hispanic                          | 1                                   | 5.97         | -149.97, 161.91     |                    | 1                                   | -45.64       | -216.24, 124.95      |                    | 1                                     | 212.68        | -169.98, 595.34      |                    | 1                                | -130.01      | -0.0003, 1700        |                    |
| Asian                             | 2                                   | -7.65        | -27.20, 11.91       | 0.0                | 2                                   | -48.70       | -130.38, 32.99       | 10.8               | 1                                     | <b>90.00</b>  | <b>27.28, 152.72</b> |                    | 0                                |              |                      |                    |
| Native Am.                        | 0                                   |              |                     |                    | 0                                   |              |                      |                    | 0                                     |               |                      |                    | 0                                |              |                      |                    |
| <b>Men</b>                        |                                     |              |                     |                    |                                     |              |                      |                    |                                       |               |                      |                    |                                  |              |                      |                    |
| Overall                           | 26                                  | <b>-4.05</b> | <b>-6.93, -1.16</b> | 35.4               | 20                                  | <b>-8.32</b> | <b>-12.41, -4.24</b> | 42.6               | 19                                    | -0.52         | -5.98, 4.95          | 41.5               | 14                               | -3.69        | -9.05, 1.67          | 0.0                |
| white                             | 20                                  | <b>-4.46</b> | <b>-7.59, -1.30</b> | 39.0               | 14                                  | <b>-9.26</b> | <b>-13.45, -5.07</b> | 41.8               | 14                                    | -2.02         | -7.21, 3.18          | 33.5               | 12                               | -4.49        | -10.11, 1.13         | 0.0                |
| African Am.                       | 2                                   | -3.83        | -14.33, 6.68        | 0.0                | 2                                   | -4.38        | -16.46, 7.71         | 7.0                | 2                                     | 3.09          | -20.84, 27.02        | 0.0                | 1                                | -101.30      | -885.68, 683.08      |                    |
| Hispanic                          | 0                                   |              |                     |                    | 0                                   |              |                      |                    | 0                                     |               |                      |                    | 0                                |              |                      |                    |
| Asian                             | 2                                   | -98.73       | -303.66, 106.20     | <b>58.8</b>        | 2                                   | -117.10      | -316.36, 82.16       | 44.8               | 1                                     | <b>90.00</b>  | <b>27.28, 152.72</b> |                    | 0                                |              |                      |                    |
| Native Am.                        | 0                                   |              |                     |                    | 0                                   |              |                      |                    | 0                                     |               |                      |                    | 0                                |              |                      |                    |
| <b>Women</b>                      |                                     |              |                     |                    |                                     |              |                      |                    |                                       |               |                      |                    |                                  |              |                      |                    |
| Overall                           | 24                                  | <b>-4.44</b> | <b>-5.94, -2.94</b> | 0.0                | 22                                  | <b>-8.56</b> | <b>-10.57, -6.55</b> | 0.0                | 19                                    | -2.32         | -4.81, 0.17          | 1.4                | 11                               | -6.41        | -12.84, 0.03         | 0.0                |
| white                             | 16                                  | <b>-4.57</b> | <b>-6.13, -3.01</b> | 0.0                | 14                                  | <b>-9.04</b> | <b>-11.15, -6.93</b> | 0.0                | 12                                    | <b>-2.60</b>  | <b>-5.02, -0.09</b>  | 0.0                | 8                                | -7.67        | -16.88, 1.54         | 18.7               |
| African Am.                       | 2                                   | -0.86        | -7.54, 5.82         | 0.0                | 2                                   | -0.80        | -8.56, 6.97          | 0.0                | 2                                     | 3.68          | -10.21, 17.57        | 0.0                | 1                                | -14.80       | -67.52, 37.92        |                    |
| Hispanic                          | 1                                   | 5.97         | -149.97, 161.91     |                    | 1                                   | -45.64       | -216.24, 124.95      |                    | 1                                     | 212.68        | -169.98, 595.34      |                    | 0                                |              |                      |                    |
| Asian                             | 2                                   | 11.28        | -27.78, 50.34       | 0.0                | 2                                   | 18.50        | -226.57, 236.57      | 45.3               | 1                                     | <b>100.00</b> | <b>21.60, 178.40</b> |                    | 0                                |              |                      |                    |
| Native Am.                        | 0                                   |              |                     |                    | 0                                   |              |                      |                    | 0                                     |               |                      |                    | 0                                |              |                      |                    |

N= number of studies; Am. = American; Random effect model was used; \*adjusted for age and sex; \*\*adjusted for sex; Statistical heterogeneity was estimated by Q and I<sup>2</sup> statistics for each of the twelve meta-analyses; Bold: p< 0.05 or I<sup>2</sup>>50%

**Supplemental Table 3 Summary of the beta estimates (regression coefficients) from the meta-analysis of the association between BMI and telomere length as outcome and relative telomere length (Telomere to Single Copy Gene ratio (T/S ratio)) as independent variable**

|                                   | All together (total pooled sample, adjusted for age) |              |                     |                    | "Young" pooled sample (age ≥18 and ≤ 60 years) |              |                     |                    | "Middle " pooled sample (60 < age ≤ 75 years) |              |                     |                    | "Old" pooled sample (age > 75 years) |          |               |                    |
|-----------------------------------|------------------------------------------------------|--------------|---------------------|--------------------|------------------------------------------------|--------------|---------------------|--------------------|-----------------------------------------------|--------------|---------------------|--------------------|--------------------------------------|----------|---------------|--------------------|
|                                   | N                                                    | estimate     | 95%C.I.             | I <sup>2</sup> (%) | N                                              | estimate     | 95%C.I.             | I <sup>2</sup> (%) | N                                             | estimate     | 95%C.I.             | I <sup>2</sup> (%) | N                                    | estimate | 95%C.I.       | I <sup>2</sup> (%) |
| <b>Both sexes (Men and Women)</b> |                                                      |              |                     |                    |                                                |              |                     |                    |                                               |              |                     |                    |                                      |          |               |                    |
| Overall                           | 58                                                   | <b>-1.58</b> | <b>-2.14, -1.01</b> | 32.7               | 55                                             | <b>-2.58</b> | <b>-3.92, -1.25</b> | <b>80.0</b>        | 50                                            | <b>-1.08</b> | <b>-1.76, -0.39</b> | 0.0                | 29                                   | 0.20     | -1.40, 1.80   | 0.0                |
| white                             | 43                                                   | <b>-1.87</b> | <b>-2.44, -1.31</b> | 8.1                | 40                                             | <b>-2.80</b> | <b>-4.77, -0.82</b> | <b>84.1</b>        | 37                                            | <b>-1.65</b> | <b>-2.45, -0.86</b> | 0.0                | 21                                   | -0.28    | -2.29, 1.73   | 0.0                |
| African Am.                       | 2                                                    | 5.66         | -6.60, 17.92        | <b>80.0</b>        | 2                                              | 5.21         | -5.67, 16.08        | 68.7               | 2                                             | 0.08         | -6.20, 6.36         | 0.0                | 1                                    | -0.74    | -12.62, 11.14 |                    |
| Hispanic                          | 3                                                    | 2.53         | -5.18, 10.25        | 17.7               | 3                                              | -0.42        | -4.19, 3.34         | 0.0                | 3                                             | 2.31         | -2.35, 6.97         | 0.0                | 2                                    | 27.29    | -40.32, 94.61 | <b>77.7</b>        |
| Asian                             | 3                                                    | -1.11        | -4.23, 2.02         | 60.4               | 3                                              | <b>-4.50</b> | <b>-5.75, -3.25</b> | 0.0                | 2                                             | 2.18         | -2.90, 7.27         | 0.0                | 0                                    |          |               |                    |
| Native Am.                        | 1                                                    | <b>-2.64</b> | <b>-3.60, -1.68</b> |                    | 1                                              | <b>-4.14</b> | <b>-5.28, -3.00</b> |                    | 1                                             | 2.23         | -1.00, 5.46         |                    | 1                                    | 4.68     | -2.35, 11.71  |                    |
| <b>Men</b>                        |                                                      |              |                     |                    |                                                |              |                     |                    |                                               |              |                     |                    |                                      |          |               |                    |
| Overall                           | 53                                                   | <b>-1.60</b> | <b>-2.52, -0.69</b> | 30.7               | 50                                             | <b>-2.88</b> | <b>-4.49, -1.27</b> | 59.0               | 42                                            | -0.96        | -2.51, 0.60         | 25.9               | 28                                   | -3.40    | -9.49, 2.67   | <b>70.2</b>        |
| white                             | 40                                                   | <b>-1.94</b> | <b>-3.04, -0.84</b> | 26.1               | 37                                             | <b>-3.47</b> | <b>-5.67, -1.27</b> | 61.7               | 32                                            | -1.34        | -3.38, 0.70         | 38.9               | 21                                   | -7.00    | -15.76, 1.77  | <b>77.2</b>        |
| African Am.                       | 2                                                    | -1.16        | -10.39, 12.69       | 38.6               | 2                                              | 2.39         | -11.17, 15.96       | 39.5               | 2                                             | -2.29        | -13.36, 8.78        | 0.0                | 1                                    | -0.39    | -22.18, 21.41 |                    |
| Hispanic                          | 3                                                    | -2.12        | -6.54, 2.31         | 0.0                | 3                                              | -2.99        | -8.61, 2.62         | 0.0                | 3                                             | 0.45         | -8.17, 9.06         | 0.0                | 1                                    | 2.04     | -9.98, 14.06  |                    |
| Asian                             | 2                                                    | -0.42        | -9.30, 8.45         | <b>78.4</b>        | 2                                              | -0.79        | -9.41, 7.83         | <b>77.5</b>        | 0                                             |              |                     |                    | 0                                    |          |               |                    |
| Native Am.                        | 1                                                    | <b>-2.31</b> | <b>-3.72, -0.90</b> |                    | 1                                              | <b>-3.96</b> | <b>-5.57, -2.36</b> |                    | 1                                             | 0.61         | -6.04, 7.26         |                    | 1                                    | 5.93     | -5.39, 17.25  |                    |
| <b>Women</b>                      |                                                      |              |                     |                    |                                                |              |                     |                    |                                               |              |                     |                    |                                      |          |               |                    |
| Overall                           | 51                                                   | <b>-1.49</b> | <b>-2.11, -0.87</b> | 26.1               | 49                                             | <b>-3.03</b> | <b>-4.03, -2.02</b> | 49.7               | 46                                            | <b>-1.25</b> | <b>-2.14, -0.37</b> | 0.0                | 27                                   | 0.37     | -1.77, 2.50   | 2.4                |
| white                             | 36                                                   | <b>-1.65</b> | <b>-2.30, -1.01</b> | 5.0                | 34                                             | <b>-3.08</b> | <b>-4.42, -1.74</b> | <b>50.1</b>        | 33                                            | <b>-2.20</b> | <b>-3.23, -1.16</b> | 0.0                | 19                                   | -0.06    | -2.88, 2.75   | 6.5                |
| African Am.                       | 2                                                    | 6.10         | -5.70, 17.91        | <b>71.3</b>        | 2                                              | 4.67         | -3.87, 13.21        | 39.9               | 2                                             | 1.43         | -6.29, 9.14         | 0.8                | 1                                    | -1.66    | -15.20, 11.89 |                    |
| Hispanic                          | 3                                                    | 7.25         | -6.05, 20.55        | 39.3               | 3                                              | 1.14         | -4.74, 7.02         | 2.4                | 3                                             | 3.03         | -2.53, 8.59         | 0.0                | 2                                    | 28.54    | -36.12, 93.20 | <b>75.4</b>        |
| Asian                             | 3                                                    | 0.04         | -1.26, 1.34         | 0.5                | 3                                              | <b>-5.61</b> | <b>-6.96, -4.26</b> | 0.0                | 2                                             | 2.18         | -2.90, 7.27         | 0.0                | 0                                    |          |               |                    |
| Native Am.                        | 1                                                    | <b>-2.92</b> | <b>-4.11, -1.73</b> |                    | 1                                              | <b>-4.42</b> | <b>-5.81, -3.03</b> |                    | 1                                             | 3.54         | 0.11, 6.98          |                    | 1                                    | 4.67     | -3.14, 12.48  |                    |

N= number of studies; Am. = American The unit of the estimates and 95%C.I. is 10<sup>-3</sup>; Random effect model was used; \*adjusted for age and sex; \*\*adjusted for sex; Statistical heterogeneity was estimated by Q and I<sup>2</sup> statistics for each of the twelve meta-analyses; Bold: p< 0.05 or I<sup>2</sup>>50%

## Online Supporting Material

### **SUPPLEMENTAL FOREST PLOTS**

Forest plots of the beta estimates (regression coefficients; ES) of the meta-analysis of the association between BMI and telomere length as outcome in all pooled populations

Either absolute telomere length (base pairs; bp) or relative telomere length (T/S ratio) was the outcome

Random effect model was used and adjusted for age if all together (the total pooled population) were analyzed and adjusted for sex if men and women were analyzed together; Statistical heterogeneity was estimated by Q and  $I^2$  statistics for each of the twelve meta-analyses; The shaded boxes indicate the inverse variance weighing of each estimate and the size of the box indicates the weight. In case no shaded box is visible, weight is very small.

Young= "Young" pooled population; age  $\geq 18$  and  $\leq 60$  years

Middle= "Middle" pooled population; age  $60 < \text{age} \leq 75$  years

Old= "Old" pooled population; age  $> 75$  years

ES=estimate

The estimate of T/S ratio is  $\times 10^{-3}$ ;

The corresponding references can be found after the last forest plot.

# Absolute telomere length (base pairs; bp): Both sexes – Overall

All together - Both sexes - Overall

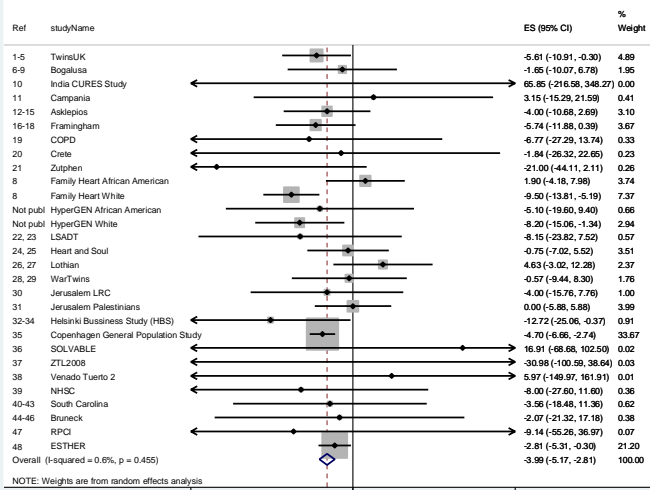

Young - Both sexes - Overall

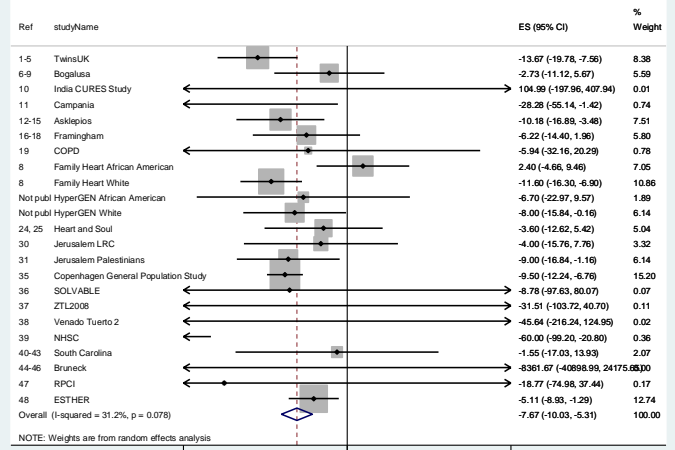

Middle - Both sexes - Overall

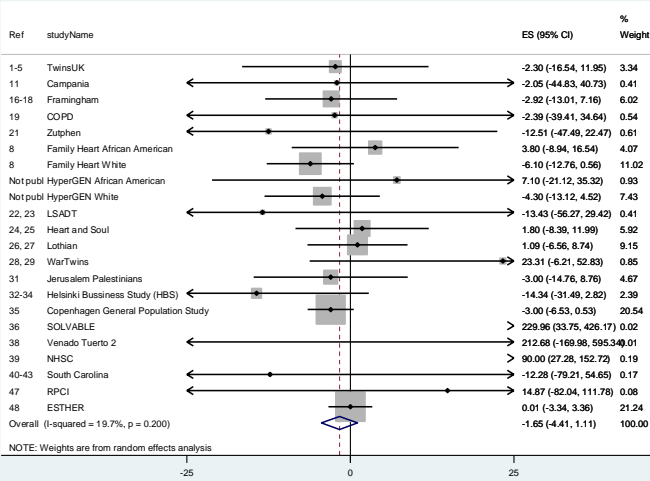

Old - Both sexes - Overall

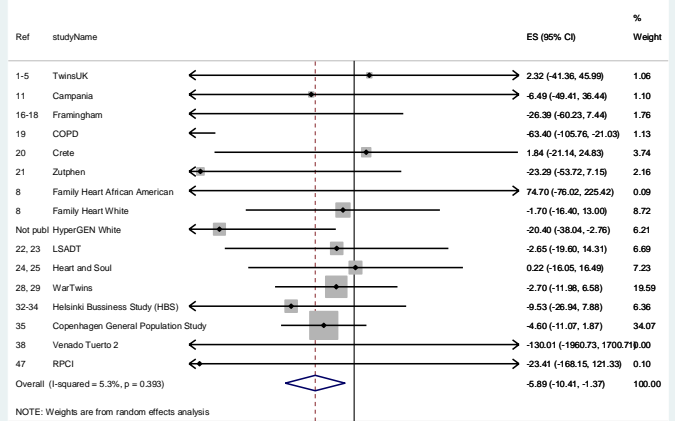

# Absolute telomere length (base pairs; bp): Both sexes – white

All together - Both sexes - white

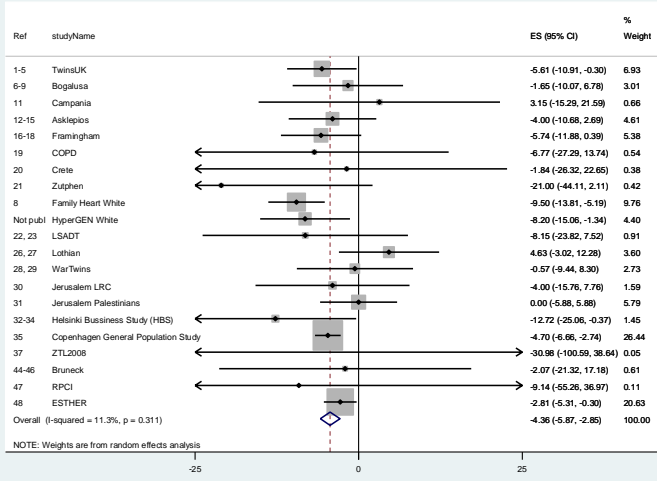

Young - Both sexes - white

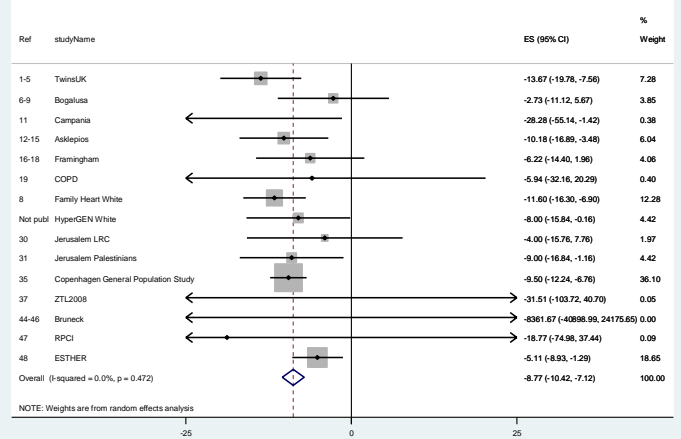

Middle - Both sexes - white

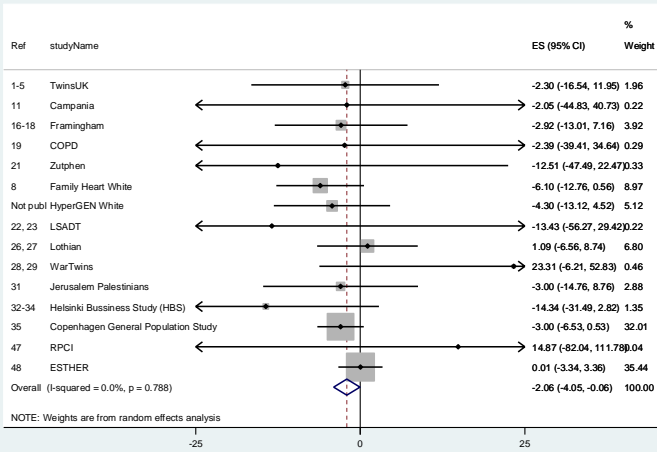

Old - Both sexes - white

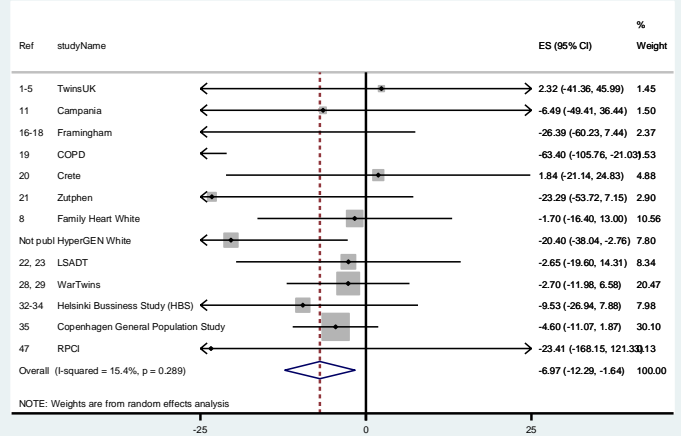



# Absolute telomere length (base pairs; bp): Both sexes – African American

All together - Both sexes - African American

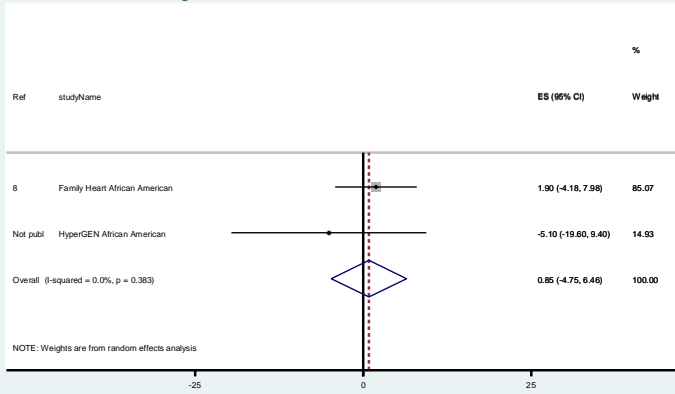

Young - Both sexes - African American

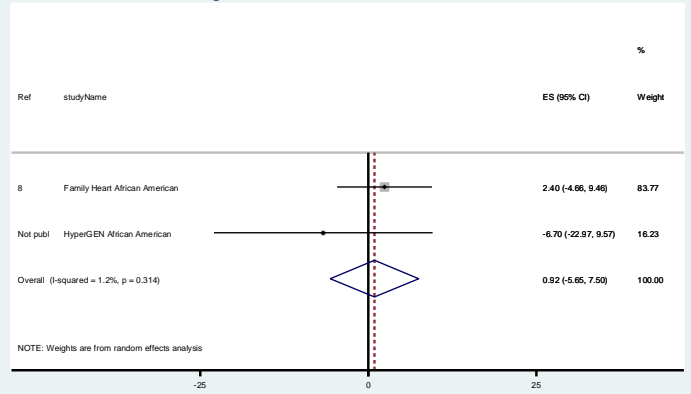

Middle - Both sexes - African American

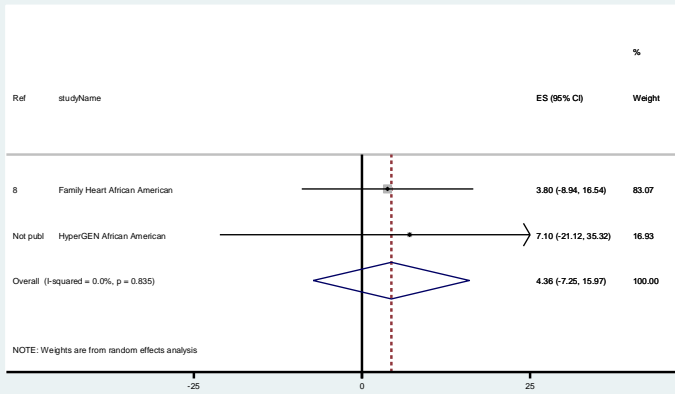

Old - Both sexes - African American

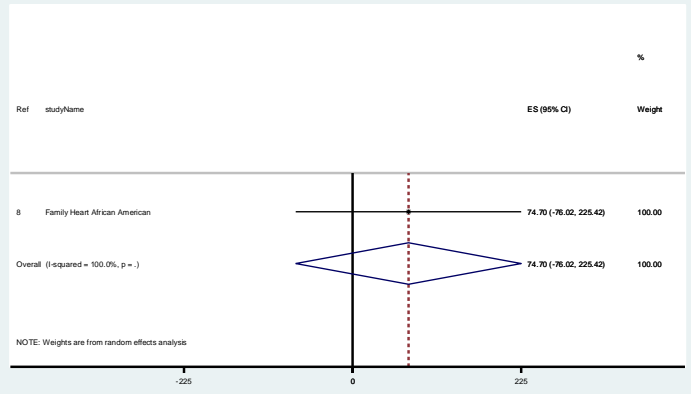

# Absolute telomere length (base pairs; bp): Both sexes - Hispanic

All together - Both sexes - Hispanic

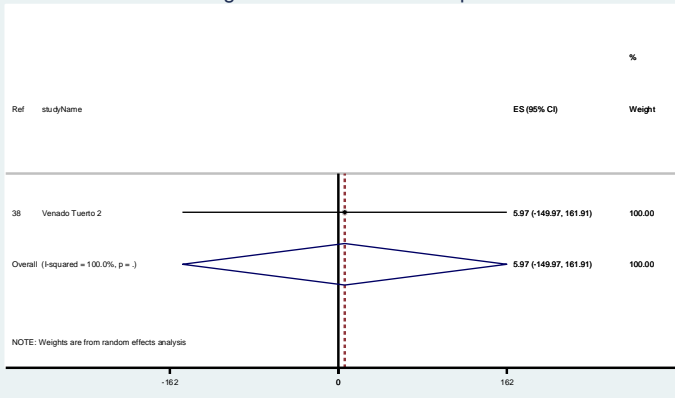

Young - Both sexes - Hispanic

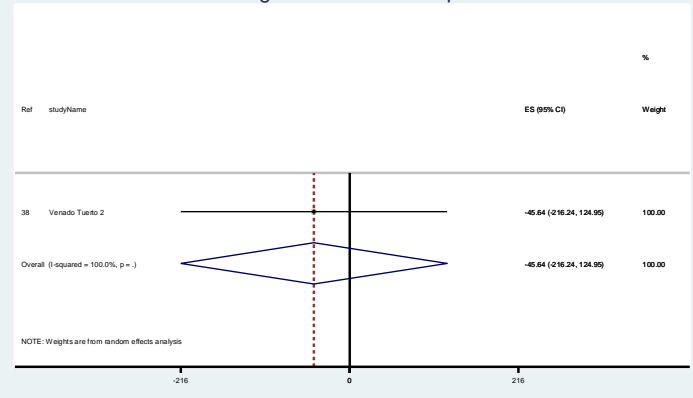

Middle - Both sexes - Hispanic

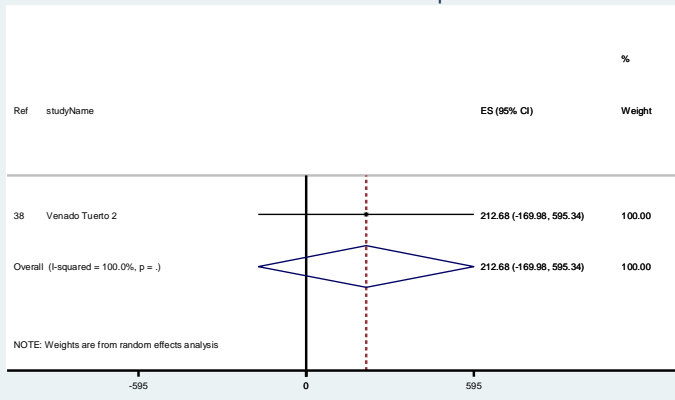

Old - Both sexes - Hispanic

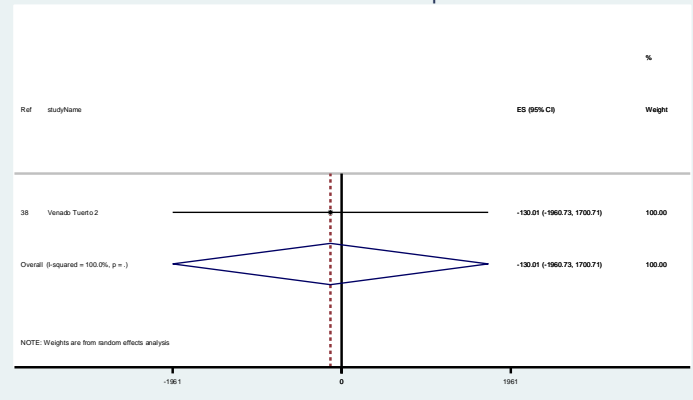

# Absolute telomere length (base pairs; bp): Both sexes - Asian

All together - Both sexes - Asian

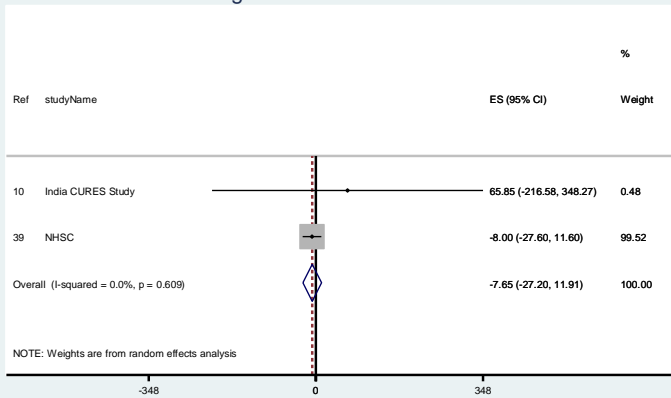

Young - Both sexes - Asian

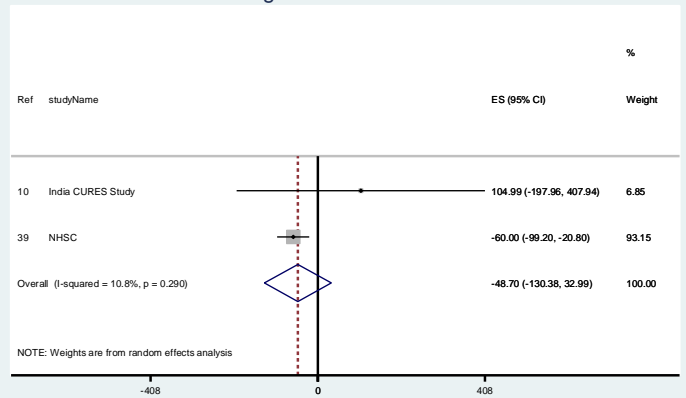

Middle - Both sexes - Asian

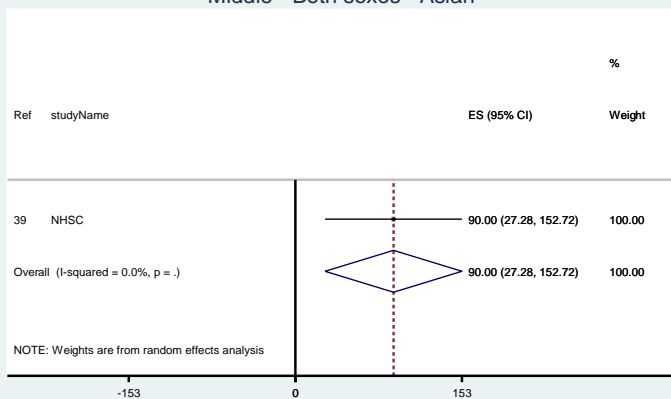

# Absolute telomere length (base pairs; bp): Men – Overall

All together - Men - Overall

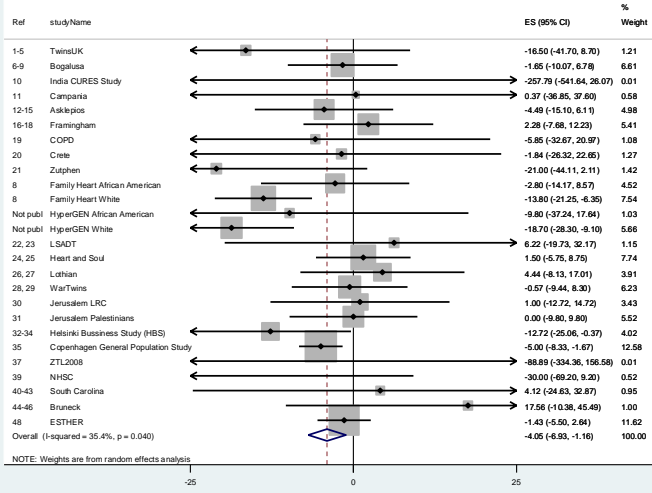

Young - Men - Overall

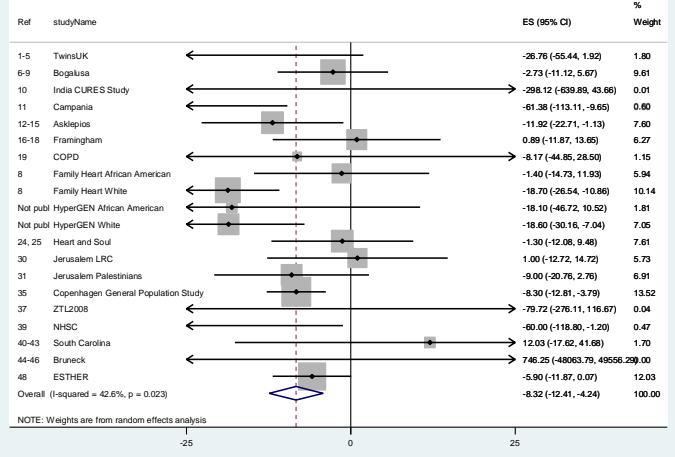

Middle - Men - Overall

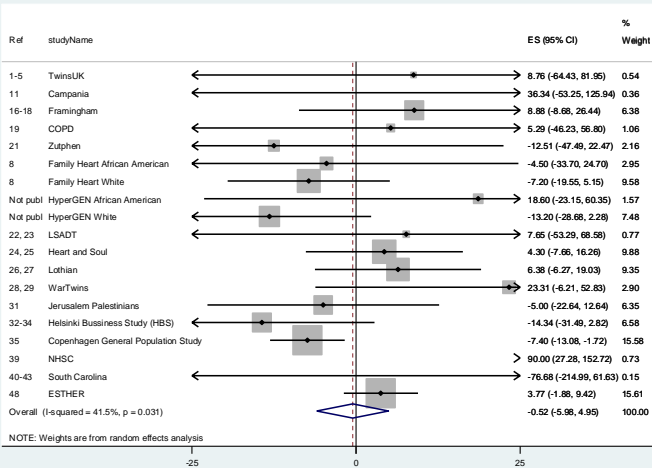

Old - Men - Overall

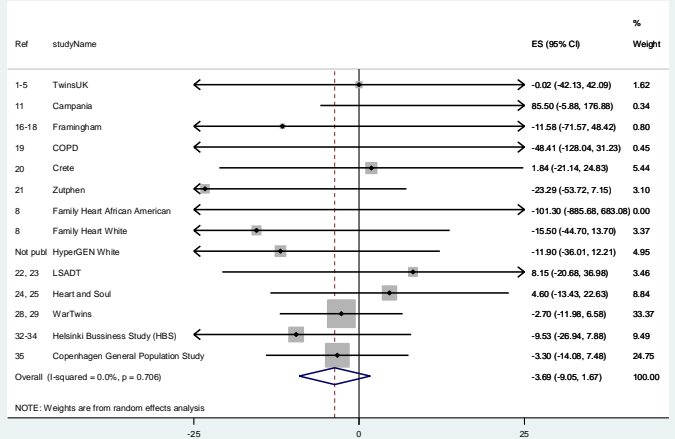

# Absolute telomere length (base pairs; bp): Men - white

All together - Men - white

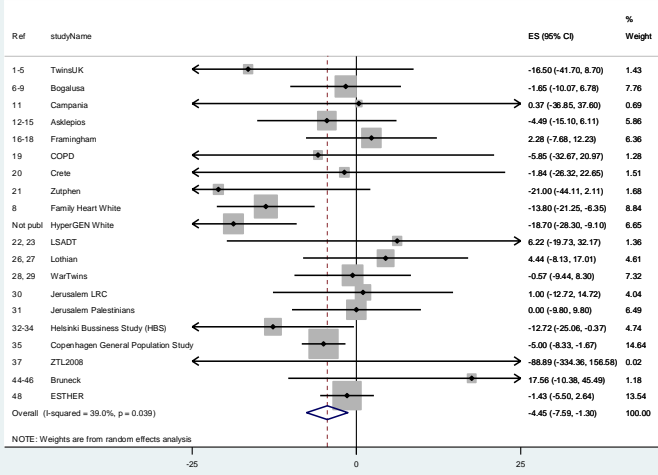

Young - Men - white

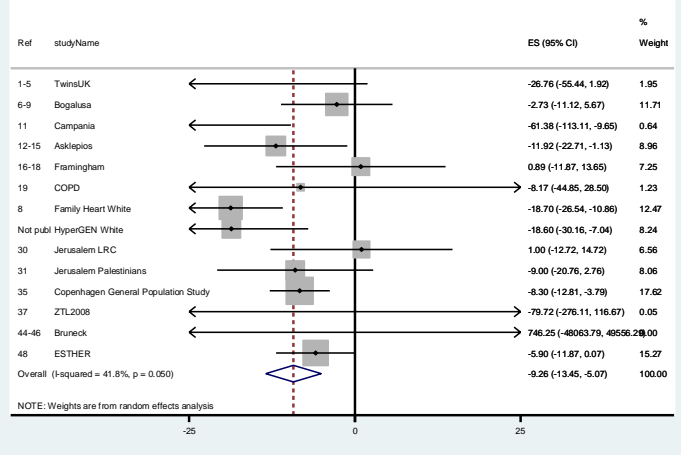

Middle - Men - white

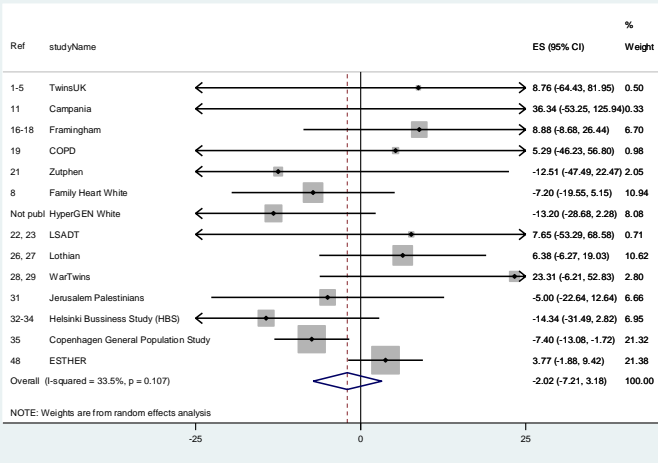

Old - Men - white

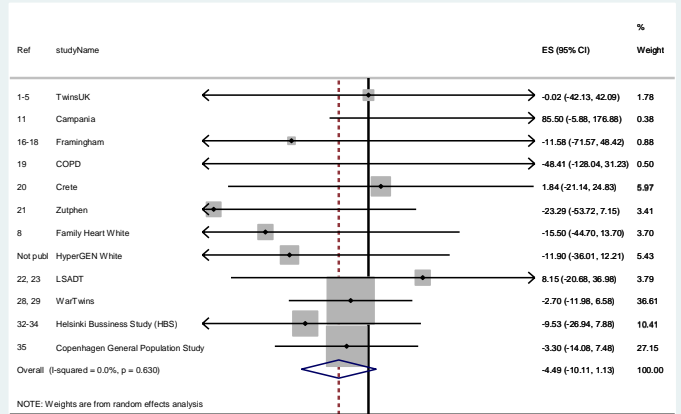

# Absolute telomere length (base pairs; bp): Men – African American

All together - Men - African American

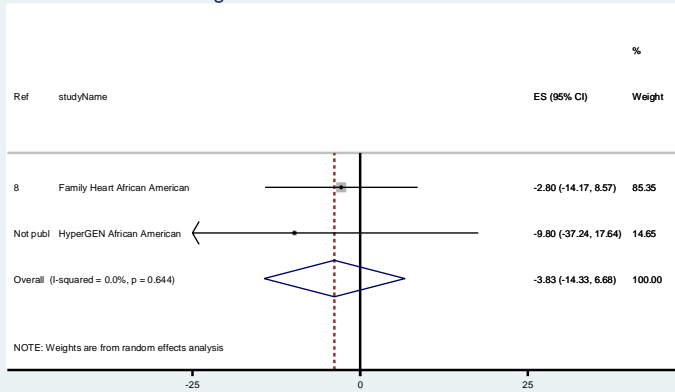

Young - Men - African American

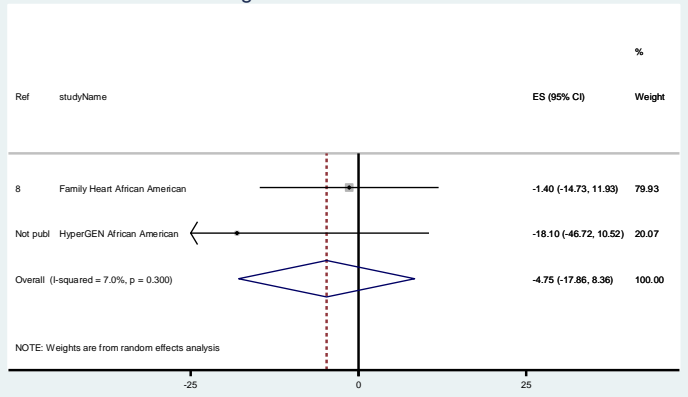

Middle - Men - African American

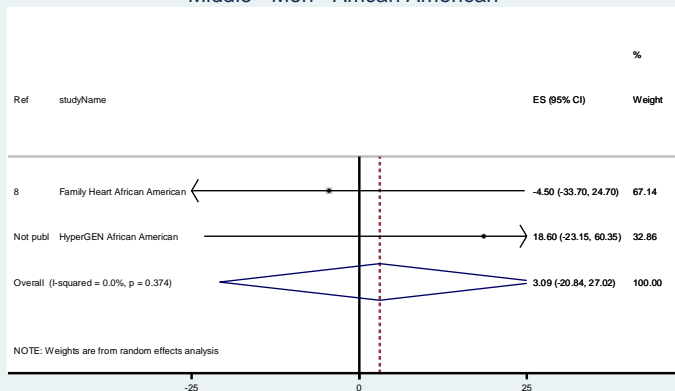

Old - Men - African American

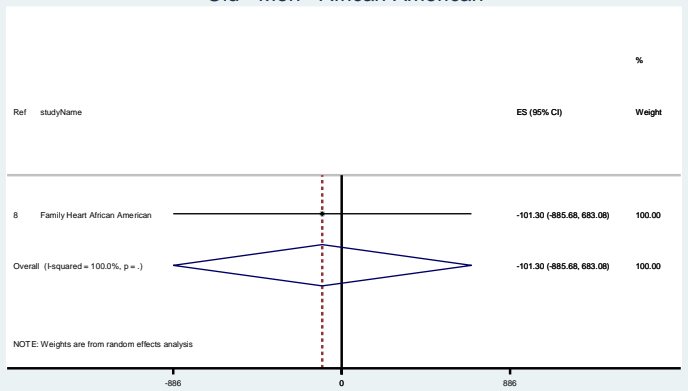

# Absolute telomere length (base pairs; bp): Men - Asian

All together - Men - Asian

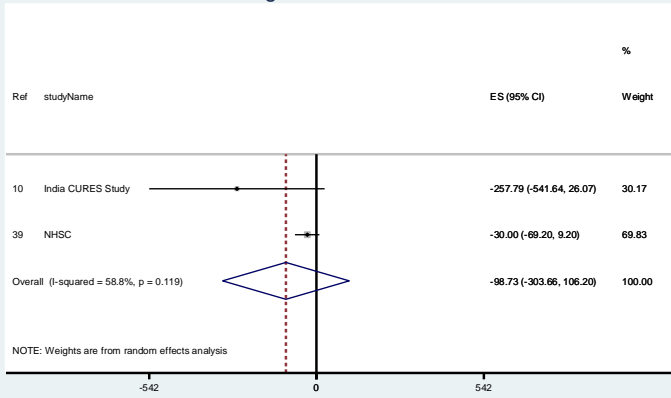

Young - Men - Asian

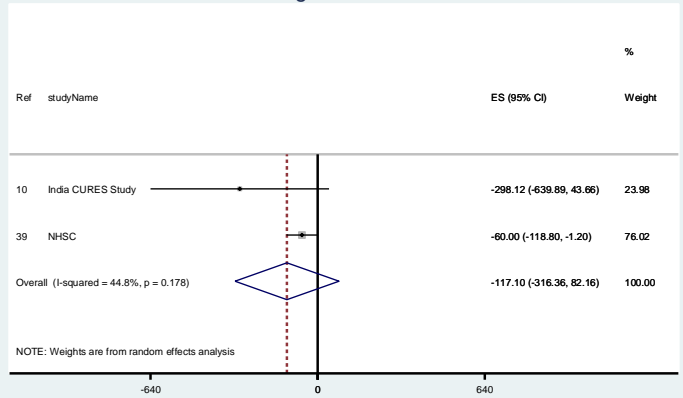

Middle - Men - Asian

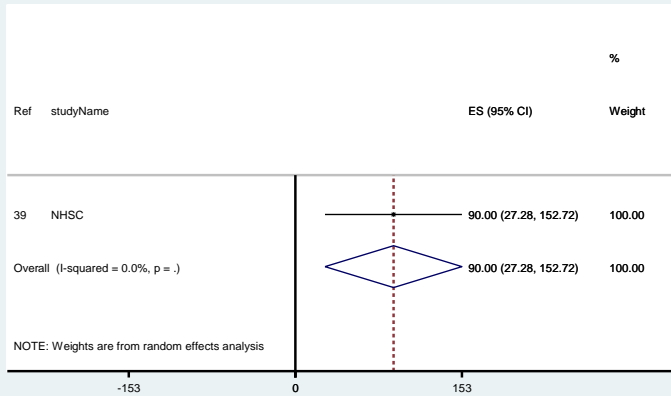

# Absolute telomere length (base pairs; bp): Women - Overall

All together - Women - Overall

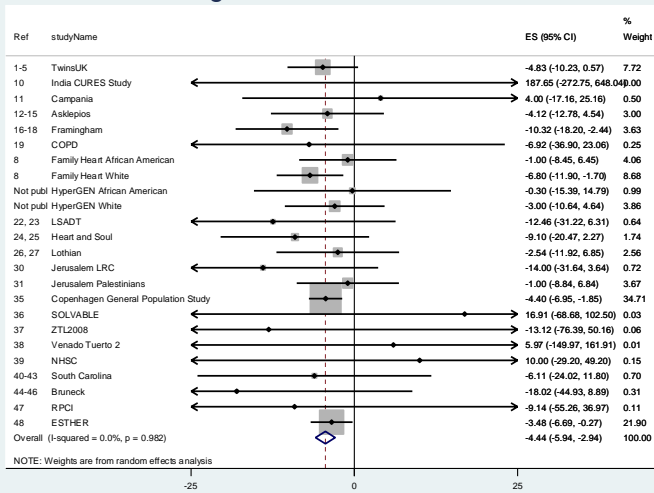

Young - Women - Overall

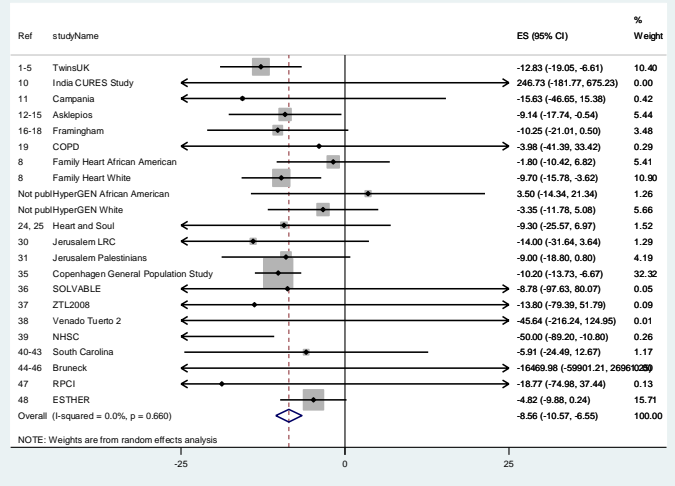

Middle - Women - Overall

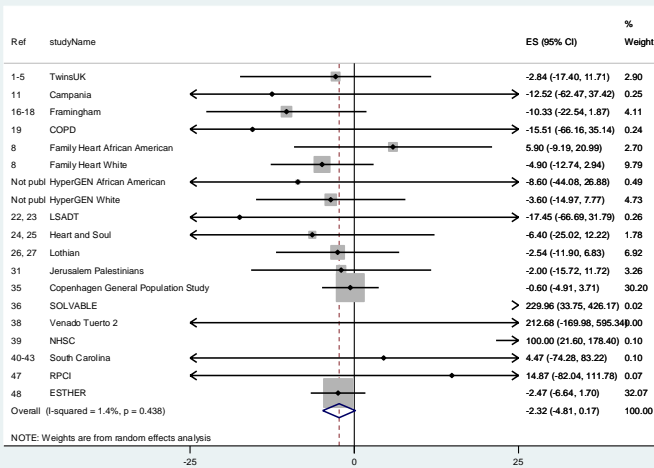

Old - Women - Overall

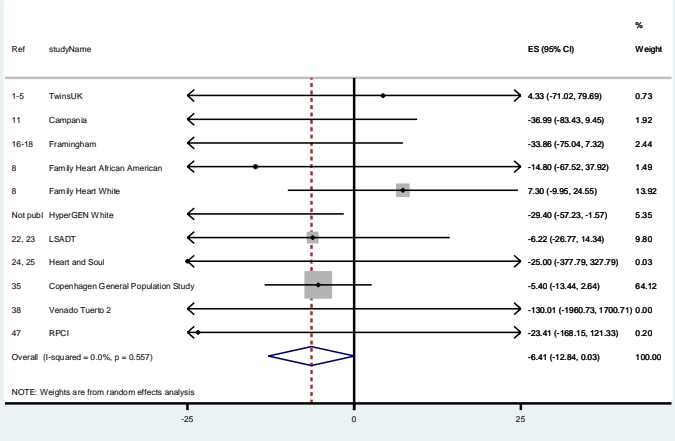



# Absolute telomere length (base pairs; bp): Women – white

All together - Women - white

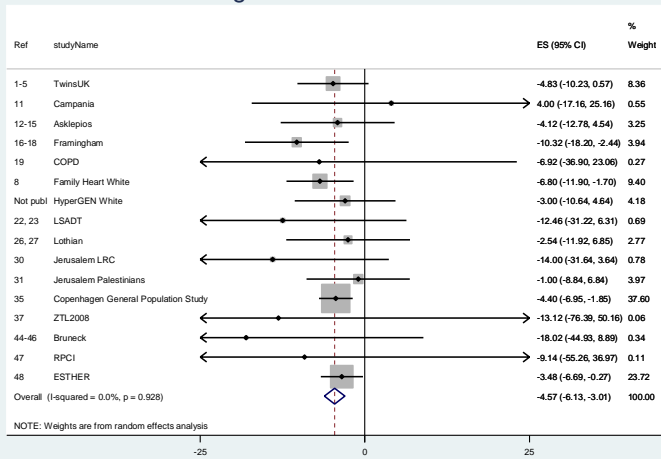

Young - Women - white

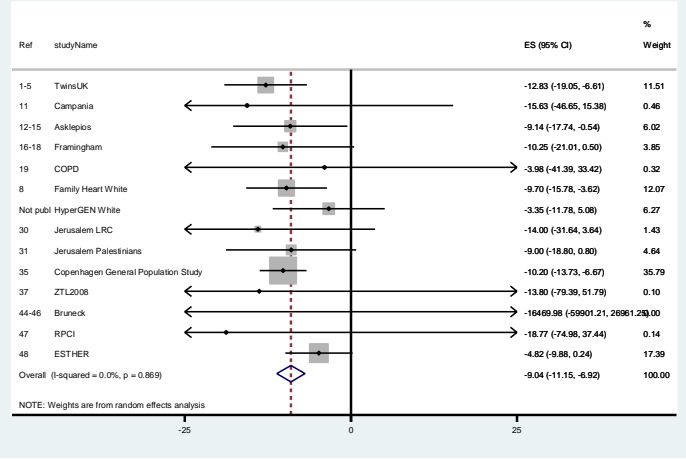

Middle - Women - white

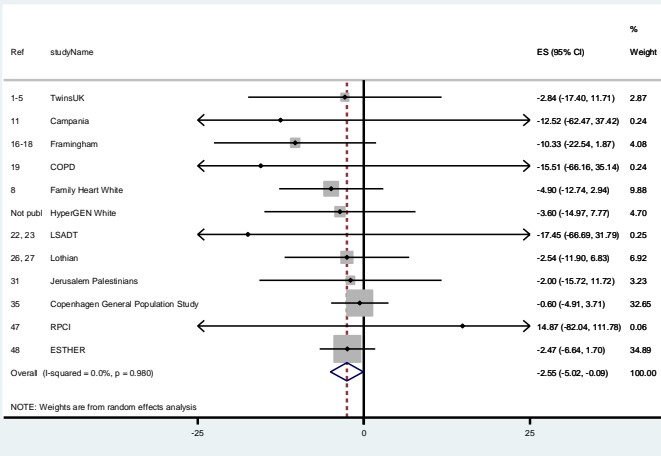

Old - Women - white

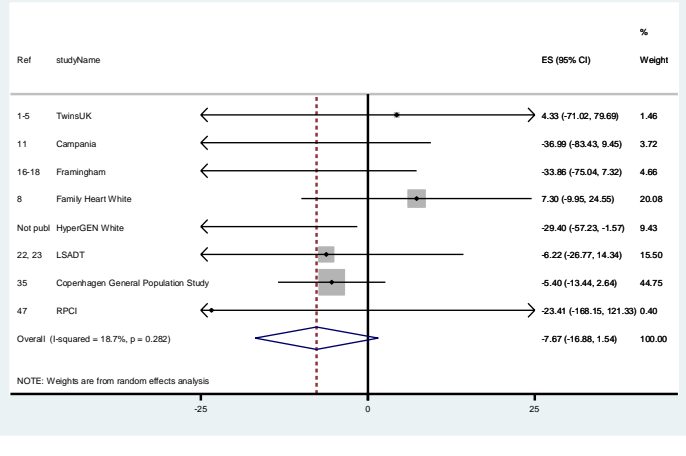

# Absolute telomere length (base pairs; bp): Women – African American

All together - Women -African American

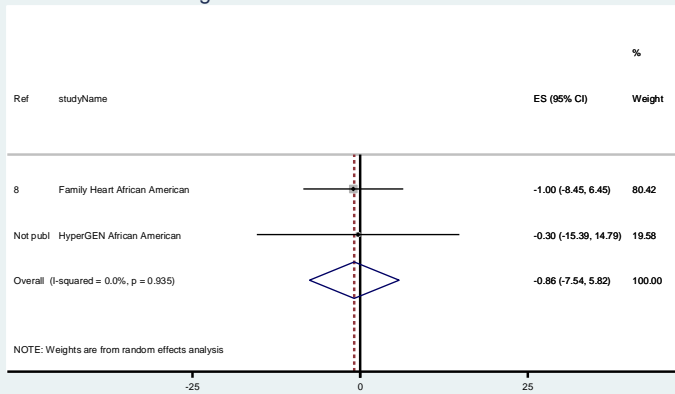

Young - Women - African American

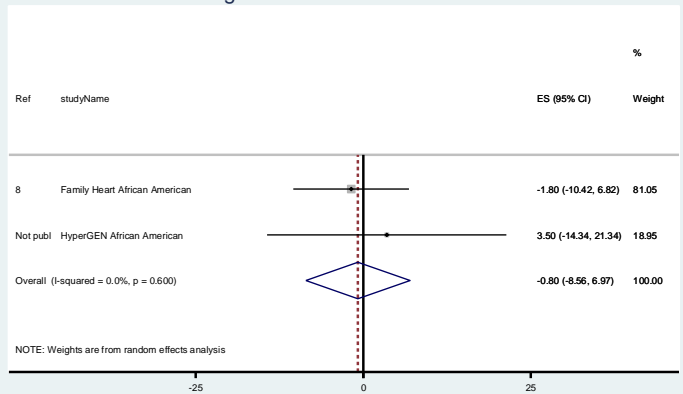

Middle - Women - African American

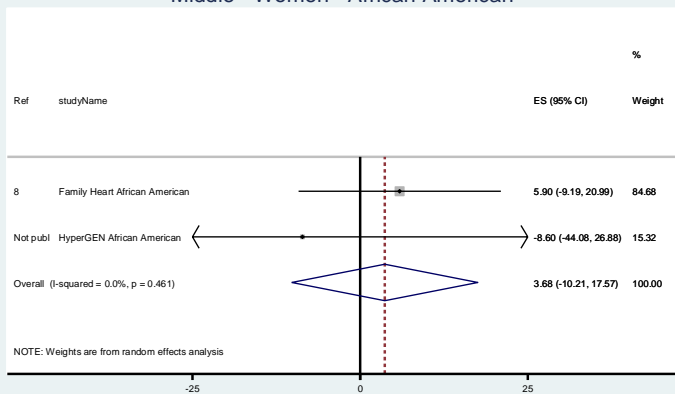

Old - Women - African American

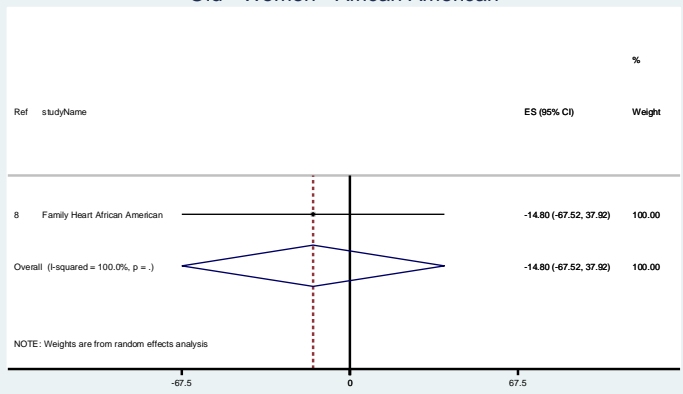

# Absolute telomere length (base pairs; bp): Women - Hispanic

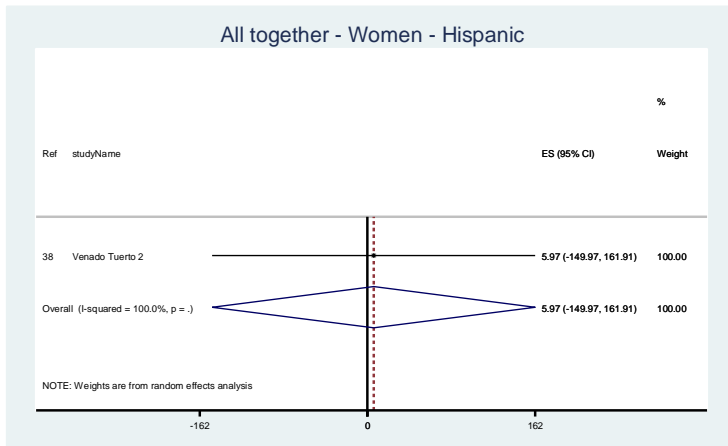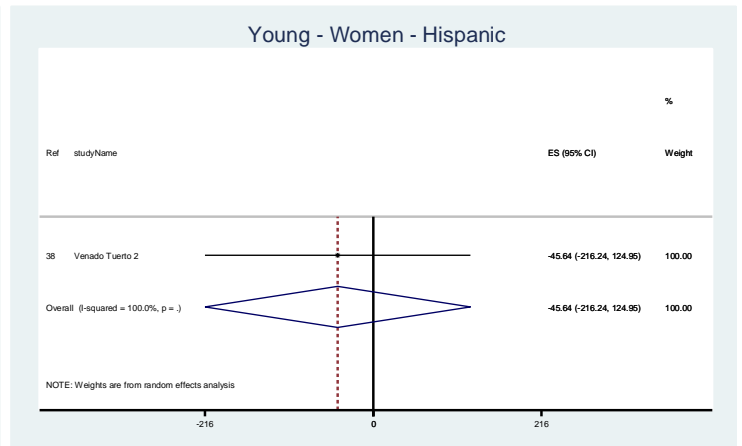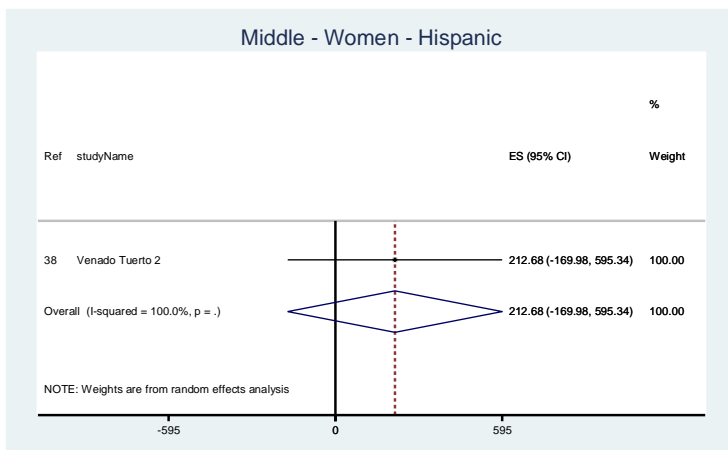

# Absolute telomere length (base pairs; bp): Women - Asian

All together - Women - Asian

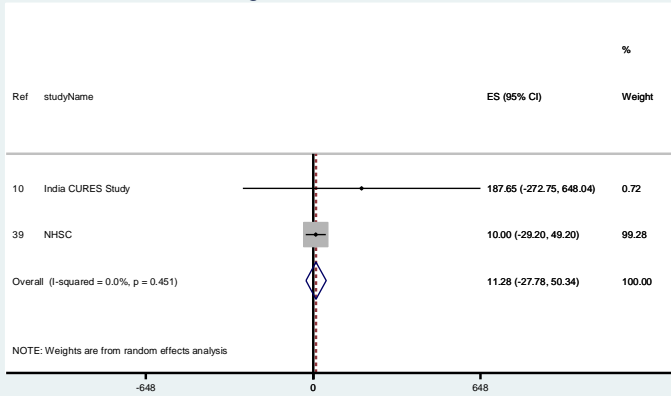

Young - Women - Asian

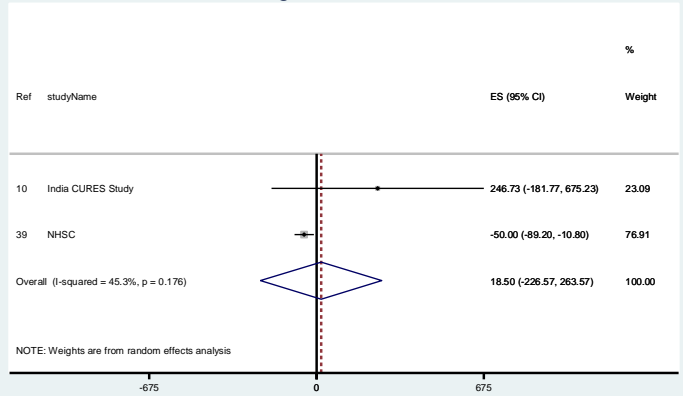

Middle - Women - Asian

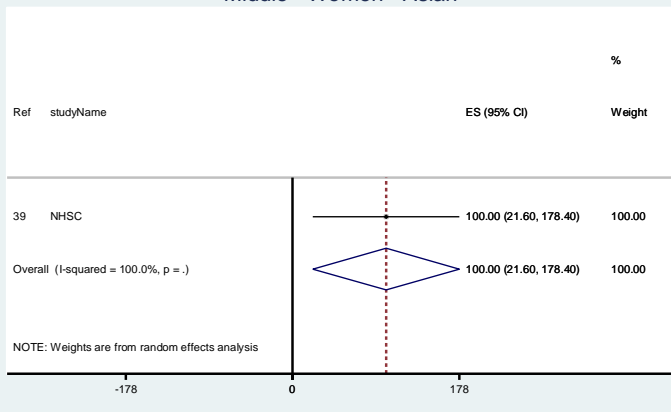

# Relative telomere length (T/S ratio): Both sexes - Overall

All together - Both sexes - Overall

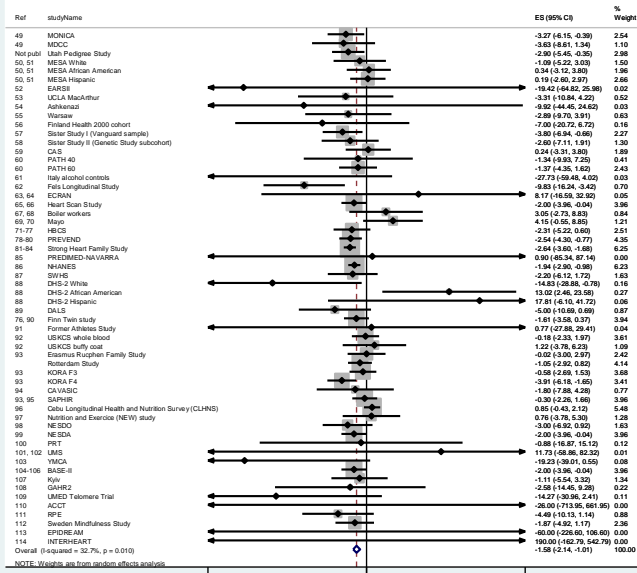

Young - Both sexes - Overall

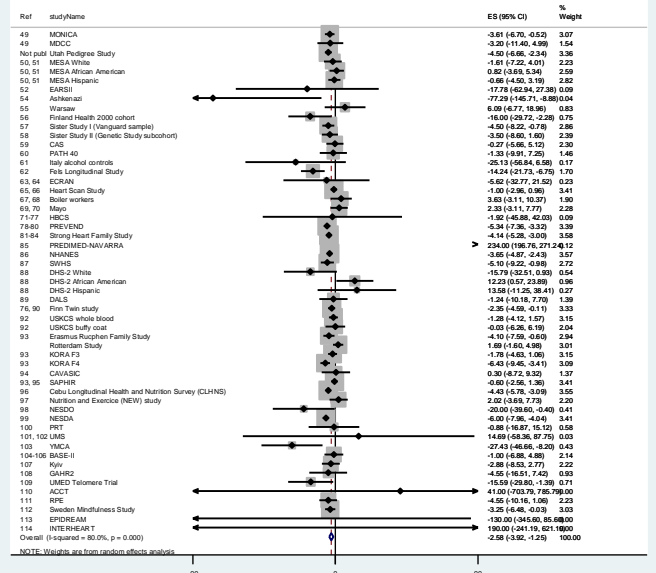

Middle - Both sexes - Overall

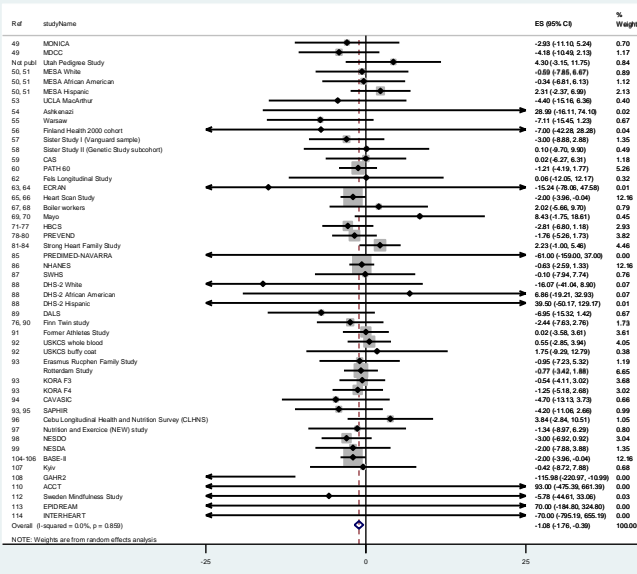

Old - Both sexes - Overall

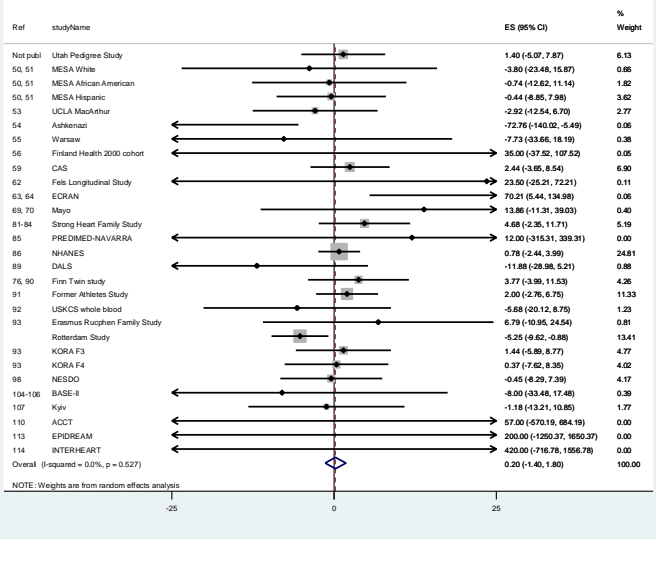

# Relative telomere length (T/S ratio): Both sexes - white

All together - Both sexes - white

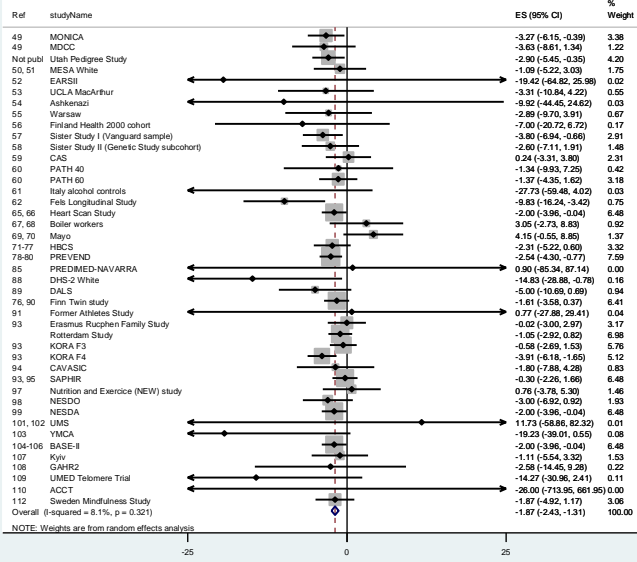

Young - Both sexes - white

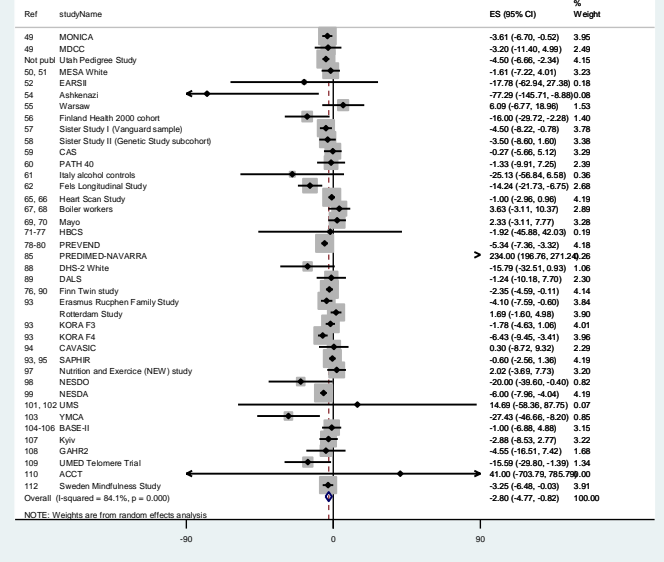

Middle - Both sexes - white

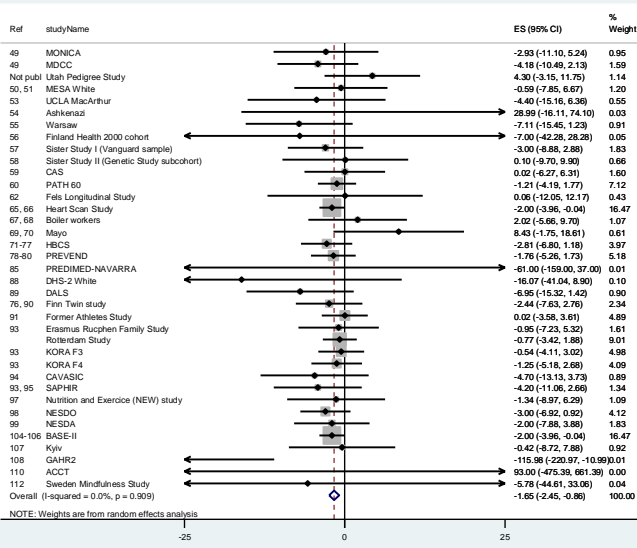

Old - Both sexes - white

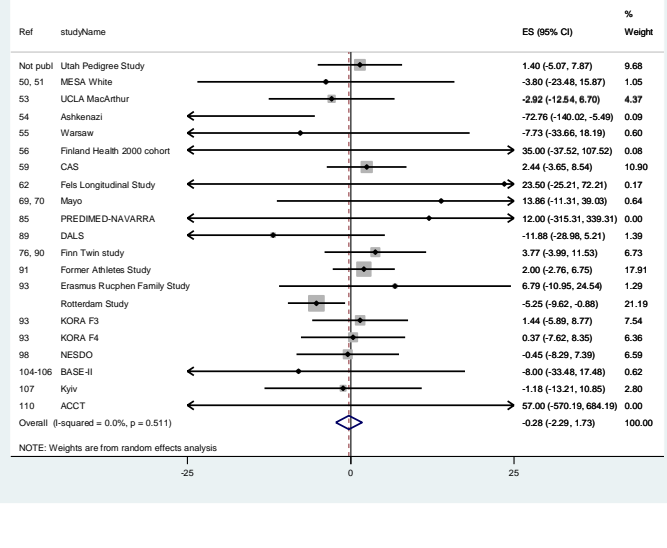

## Relative telomere length (T/S ratio): Both sexes – African American

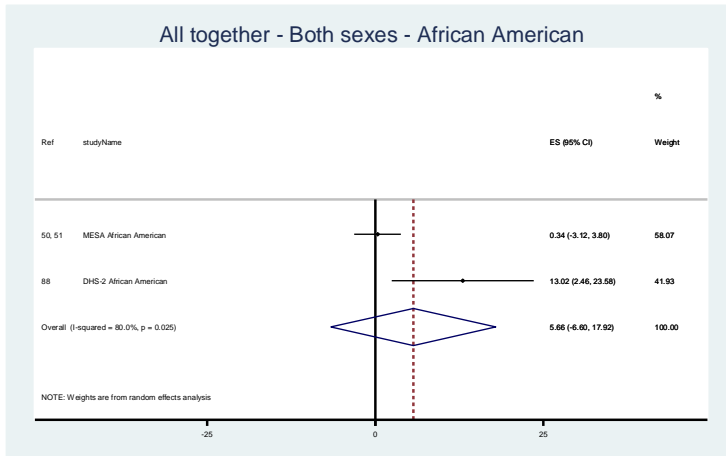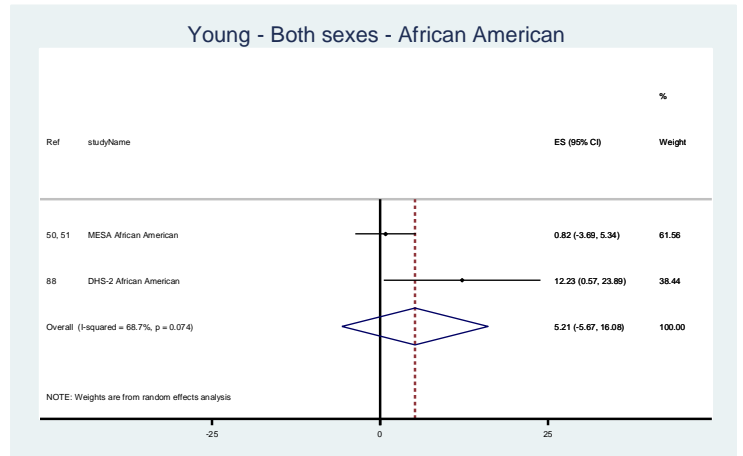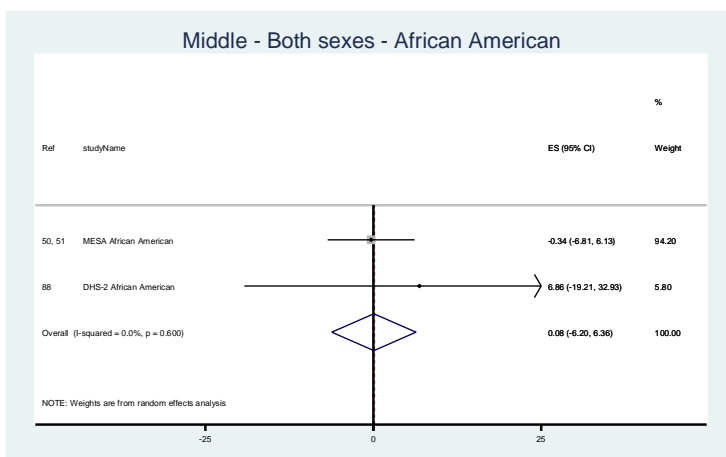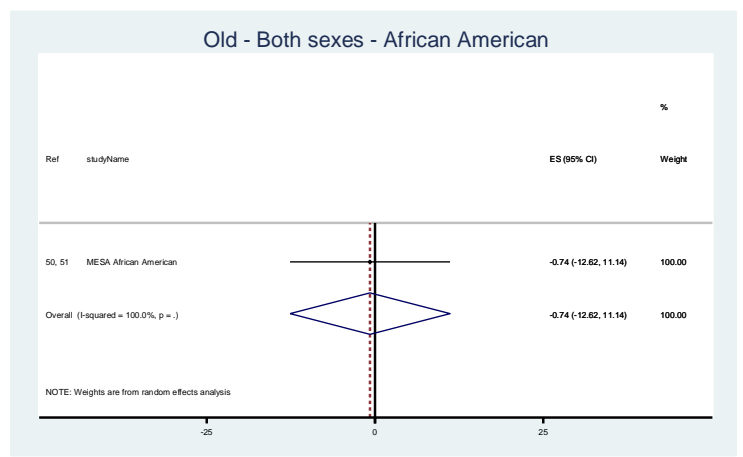

## Relative telomere length (T/S ratio): Both sexes - Hispanic

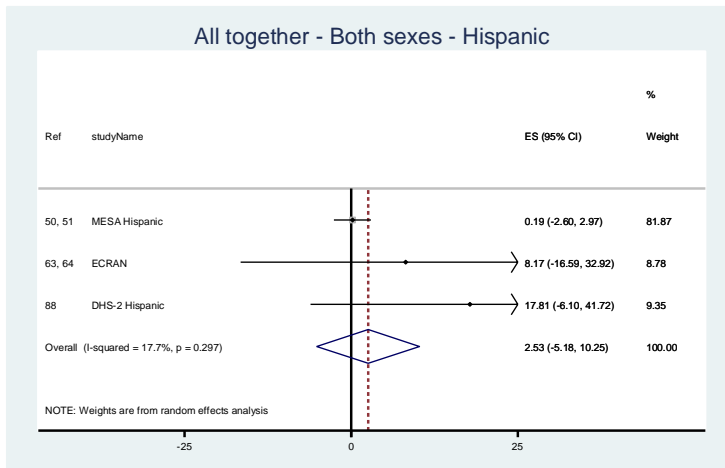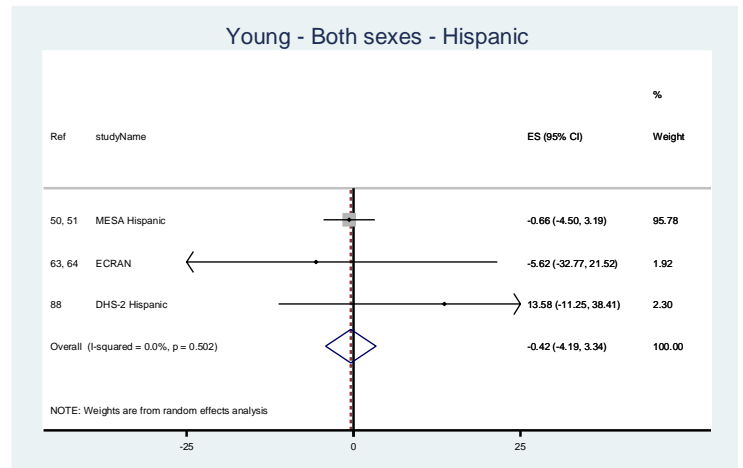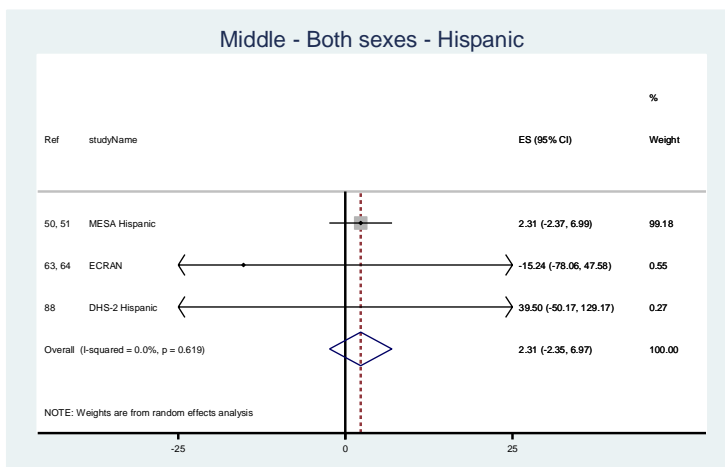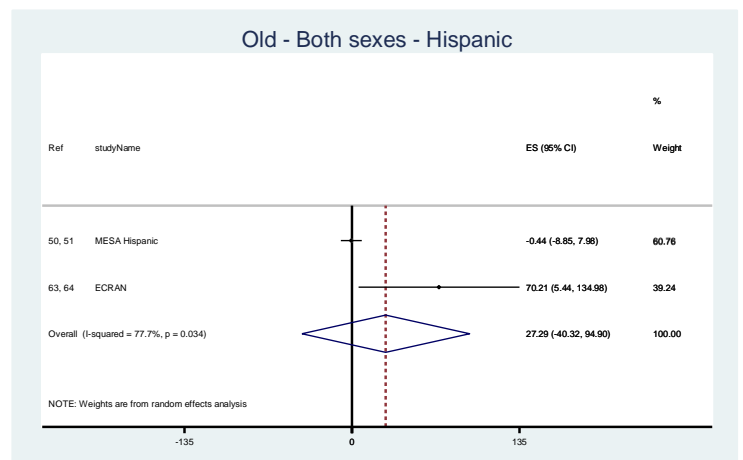



# Relative telomere length (T/S ratio): Both sexes - Asian

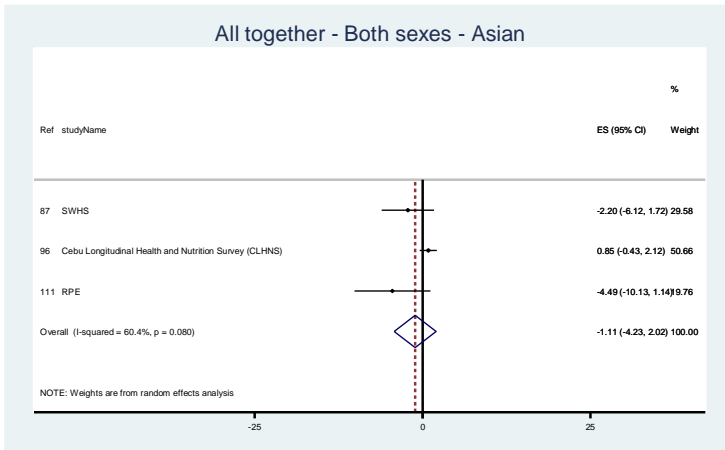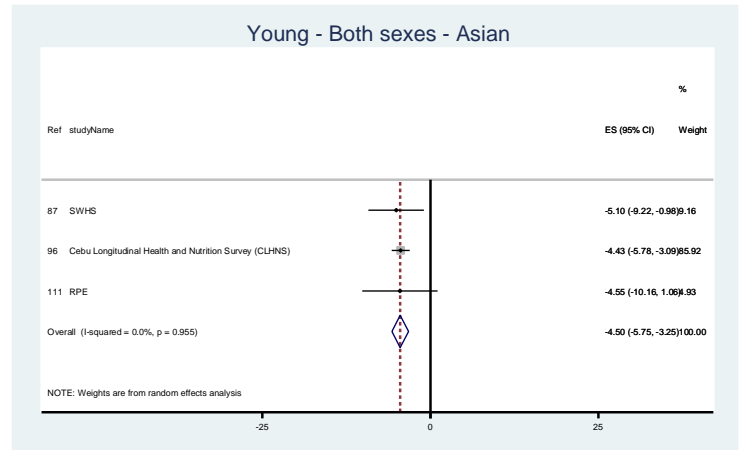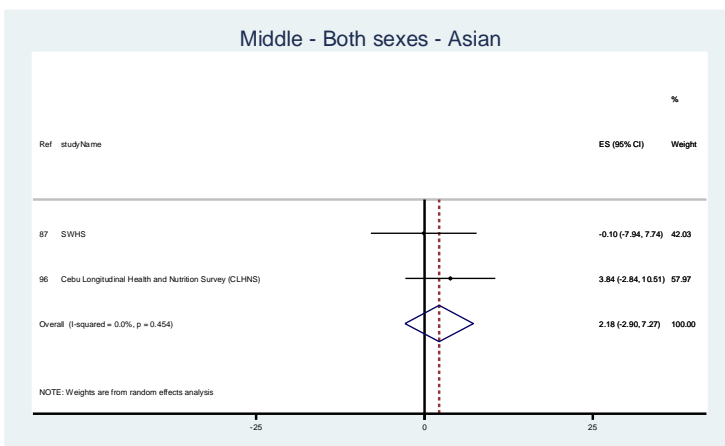

## Relative telomere length (T/S ratio): Both sexes – Native American

All together - Both sexes - Native American

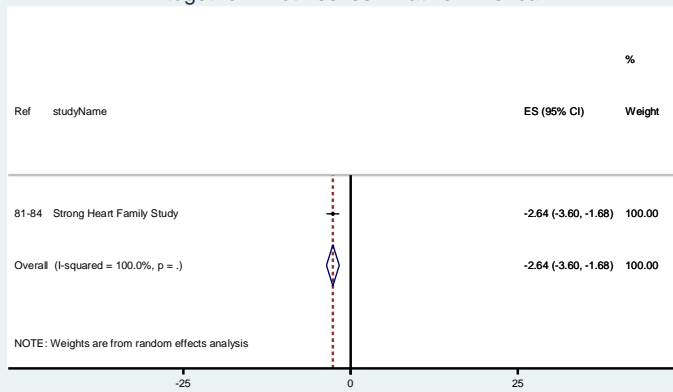

Young - Both sexes - Native American

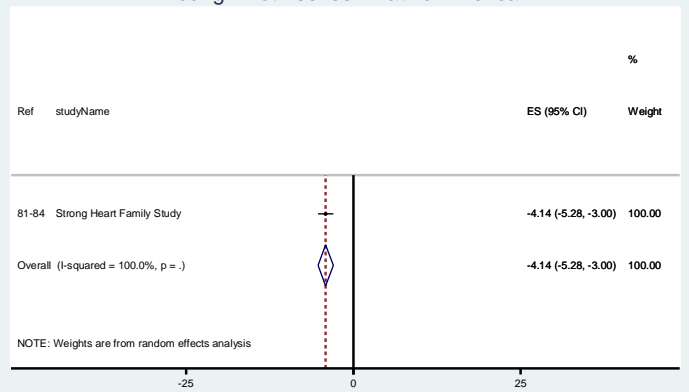

Middle - Both sexes - Native American

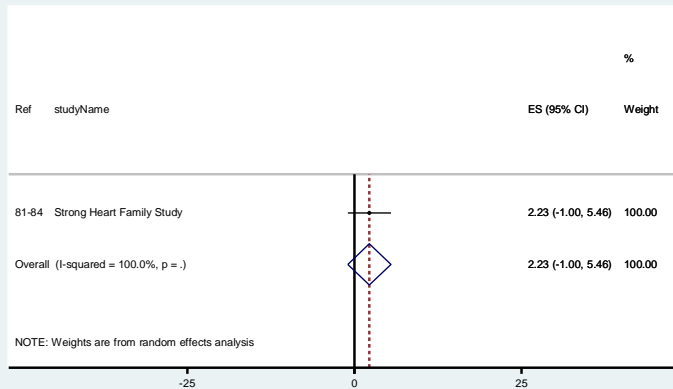

Old - Both sexes - Native American

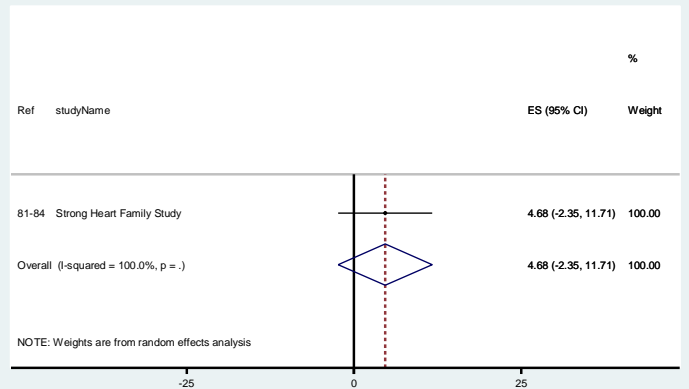

# Relative telomere length (T/S ratio): Men - Overall

All together - Men - Overall

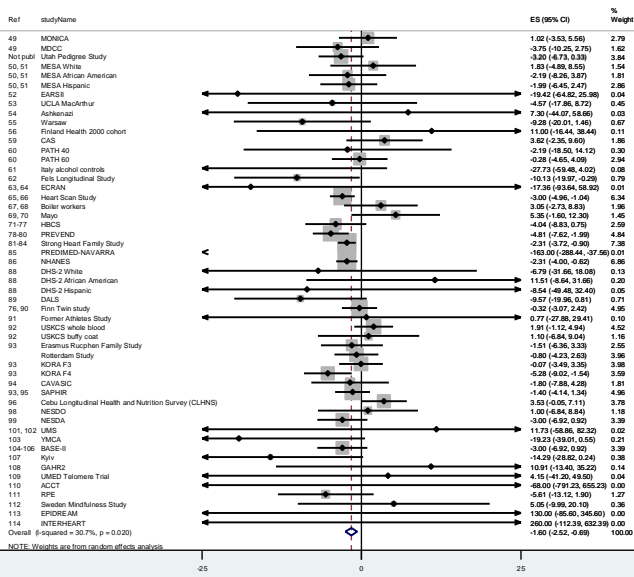

Young - Men - Overall

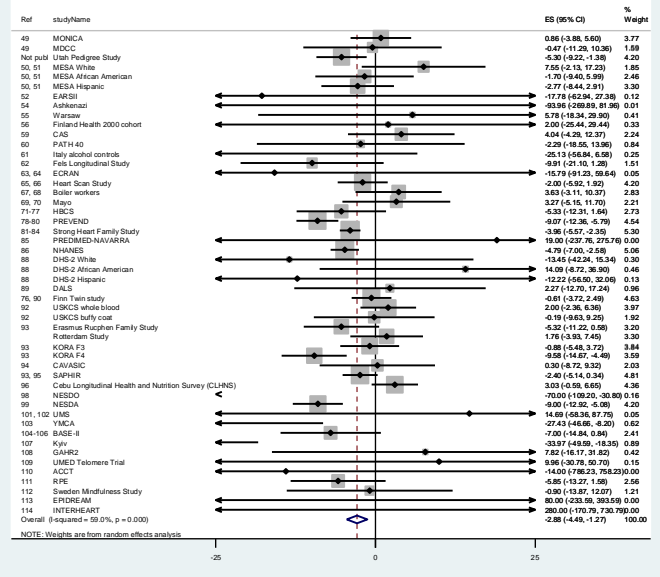

Middle - Men - Overall

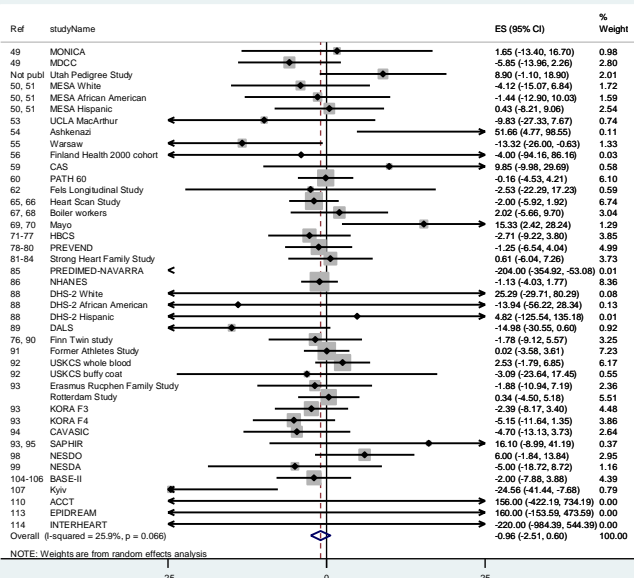

Old - Men - Overall

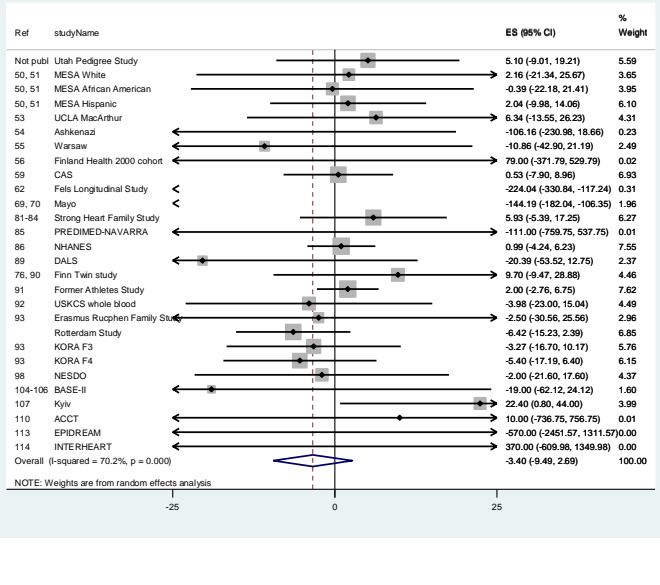

# Relative telomere length (T/S ratio): Men - white

All together - Men - white

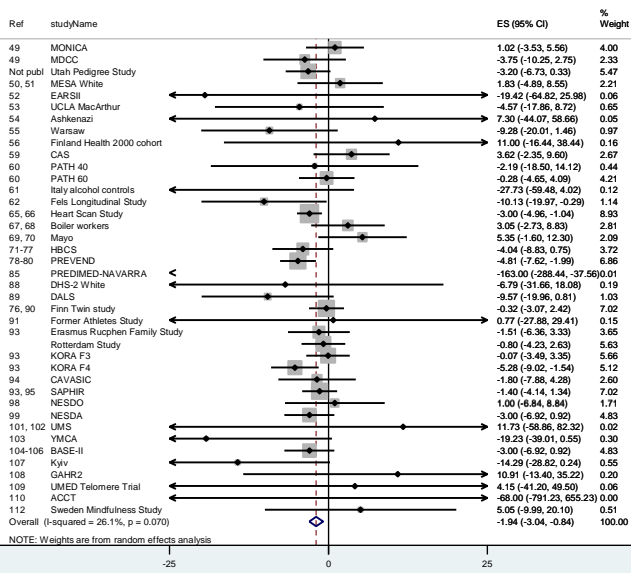

Young - Men - white

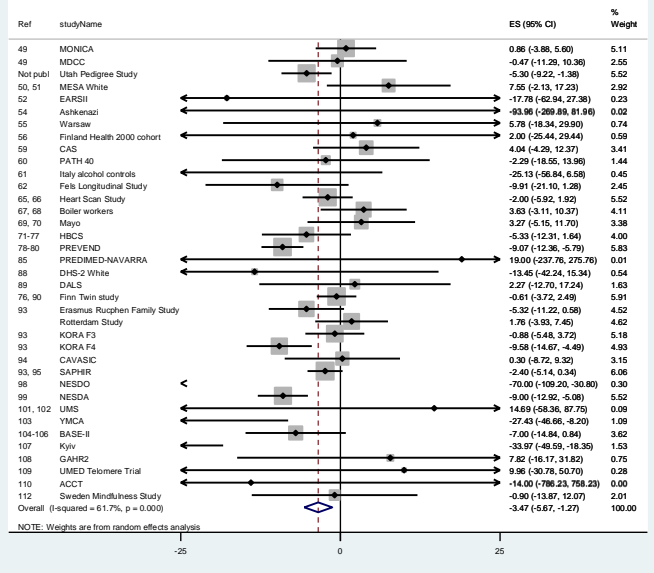

Middle - Men - white

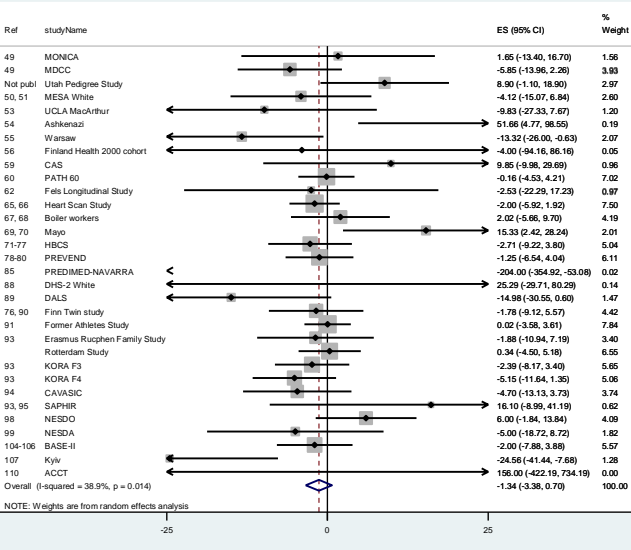

Old - Men - white

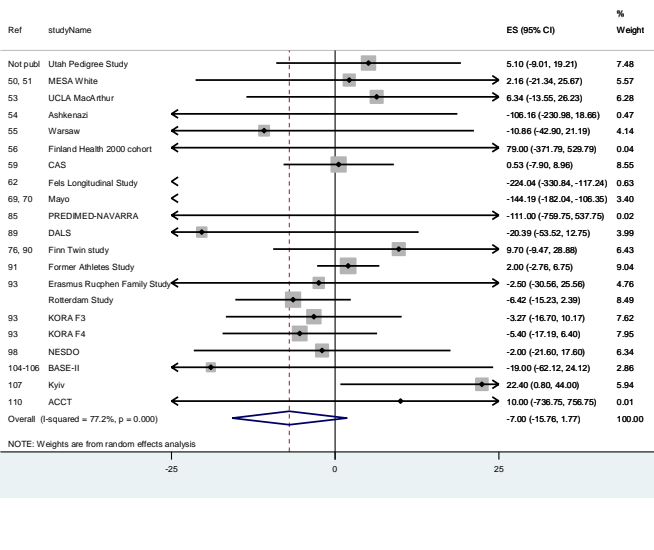

# Relative telomere length (T/S ratio): Men – African American

All together - Men - African American

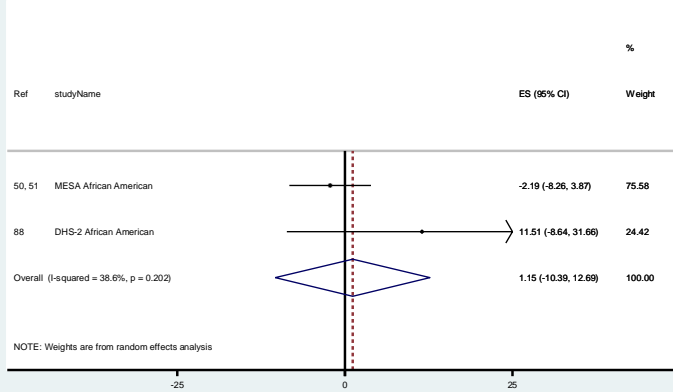

Young - Men - African American

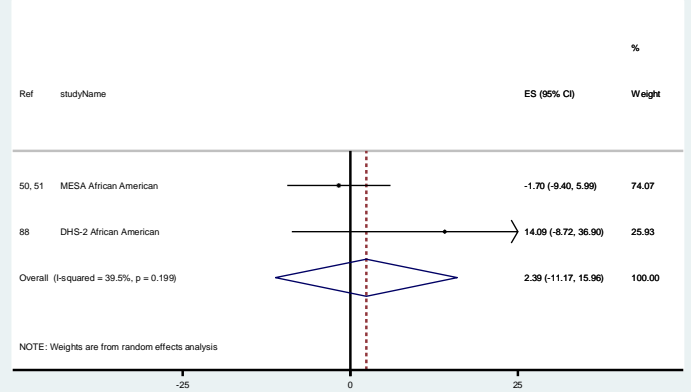

Middle - Men - African American

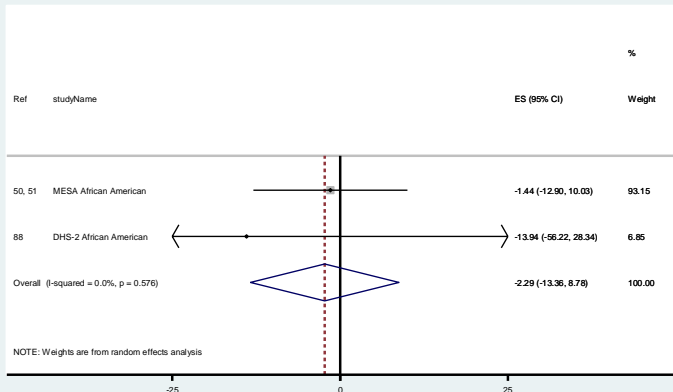

Old - Men - African American

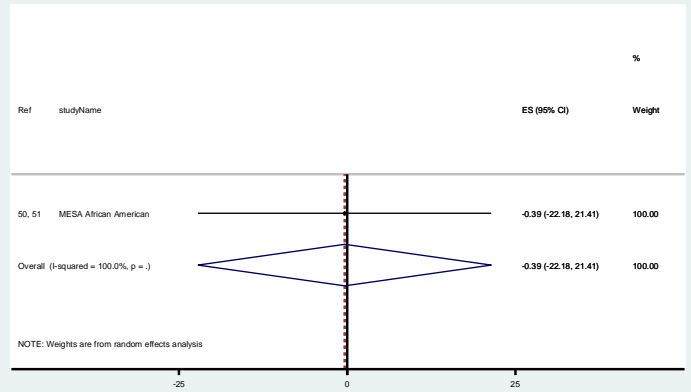

# Relative telomere length (T/S ratio): Men - Hispanic

All together - Men - Hispanic

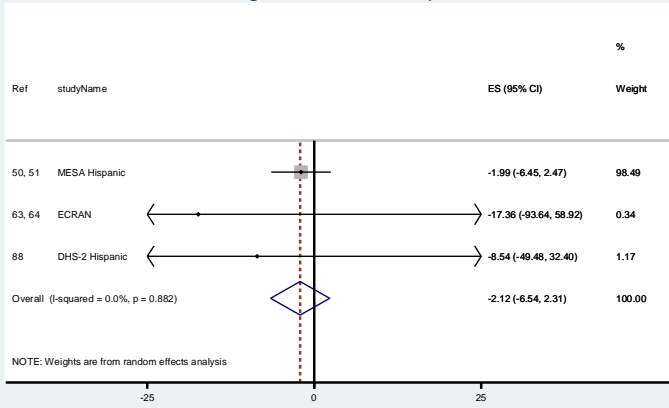

Young - Men - Hispanic

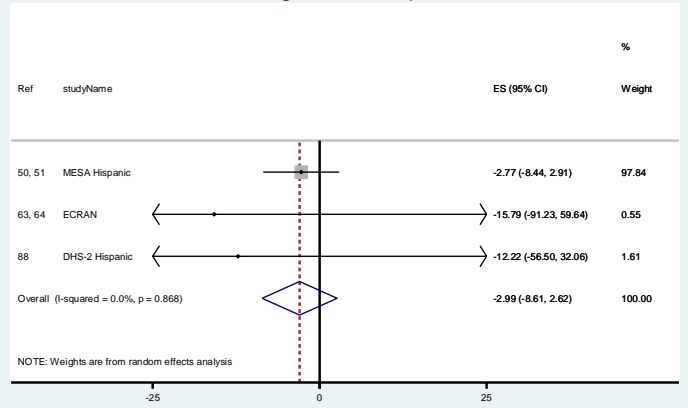

Middle - Men - Hispanic

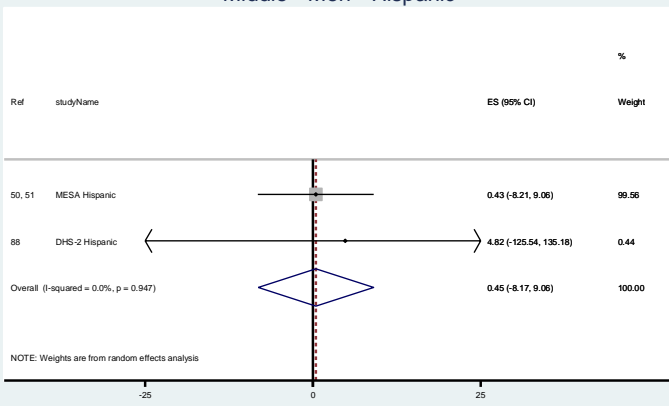

Old - Men - Hispanic

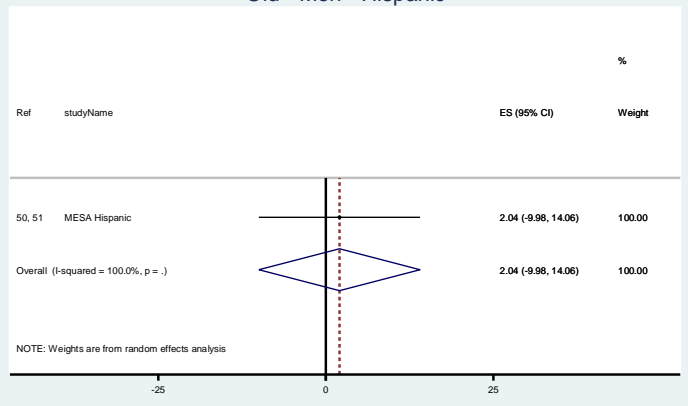

## Relative telomere length (T/S ratio): Men - Asian

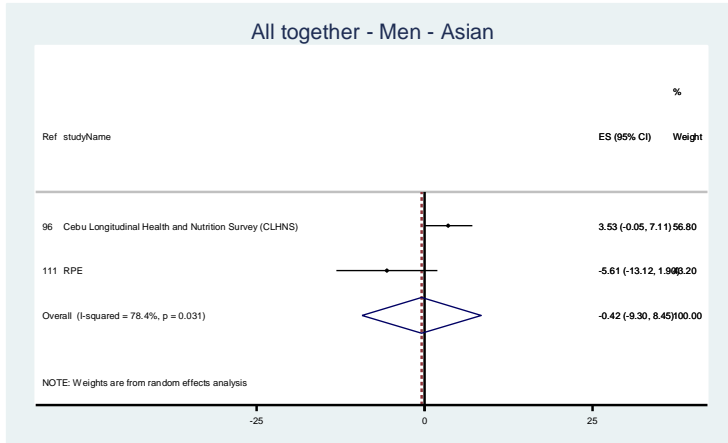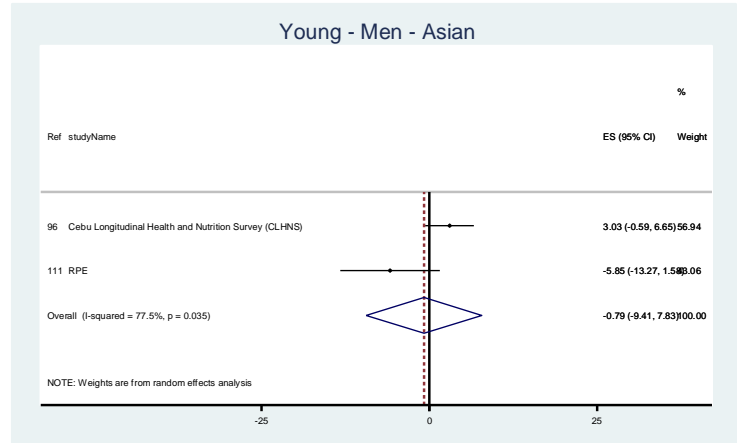

## Relative telomere length (T/S ratio): Men – Native American

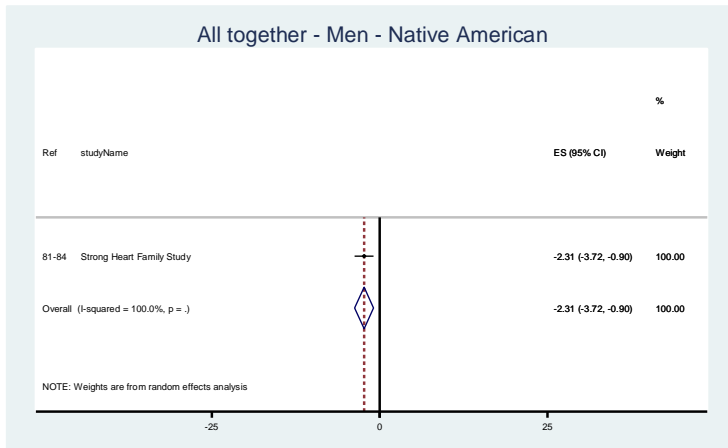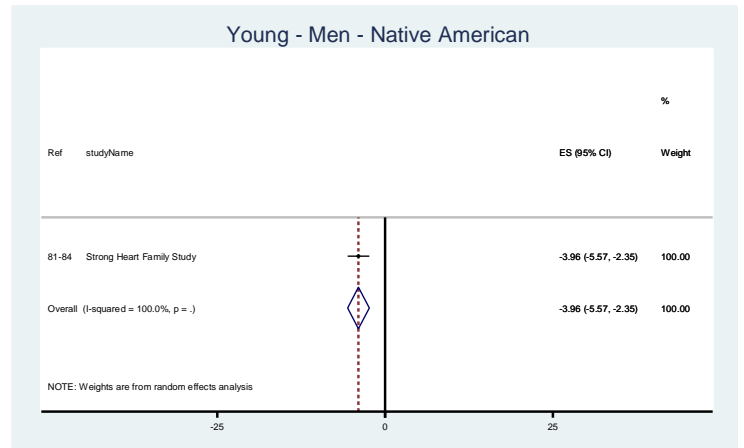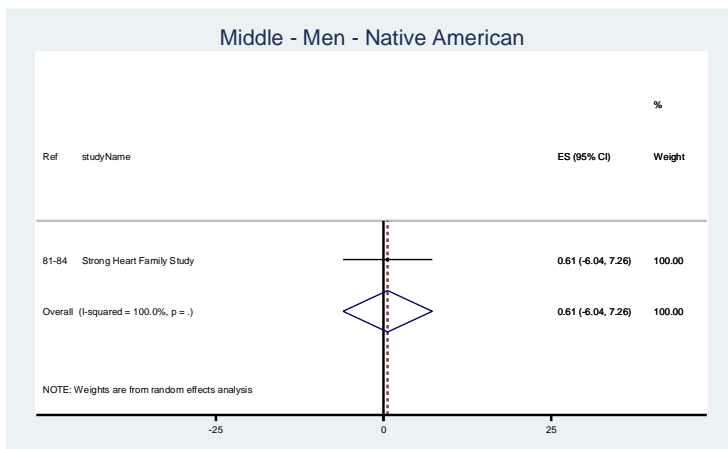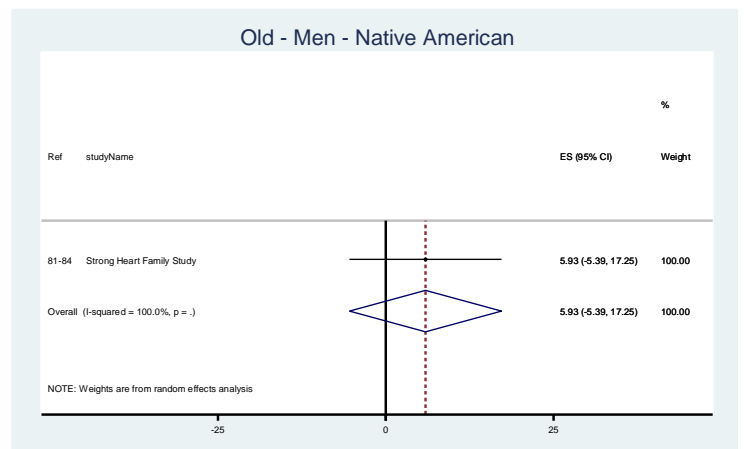



# Relative telomere length (T/S ratio): Women - Overall

All together - Women - Overall

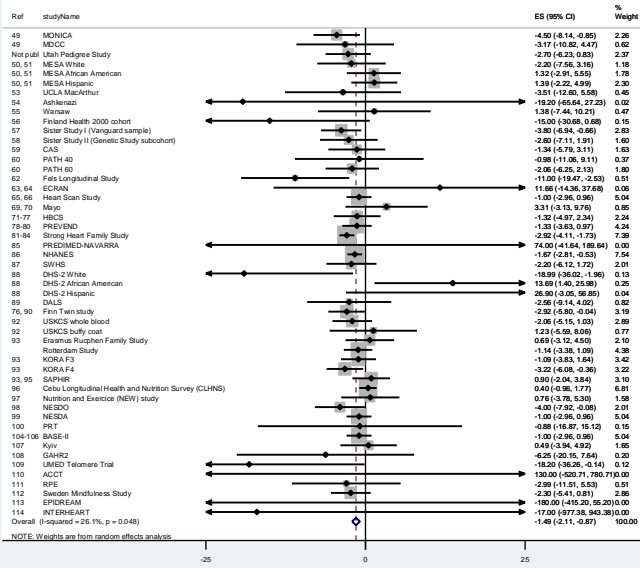

Young - Women - Overall

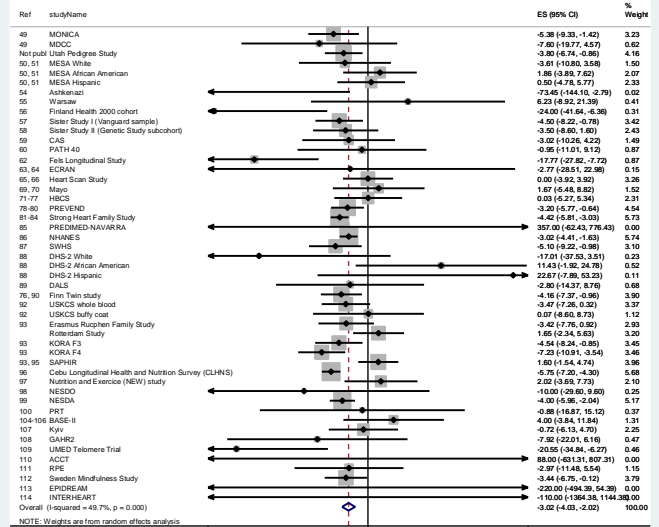

Middle - Women - Overall

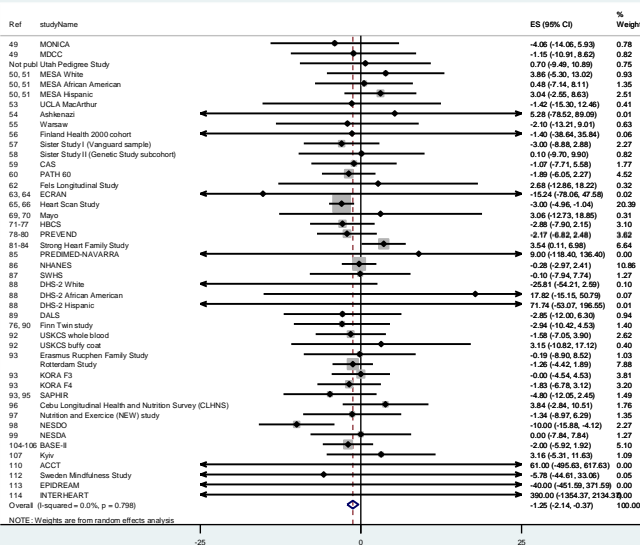

Old - Women - Overall

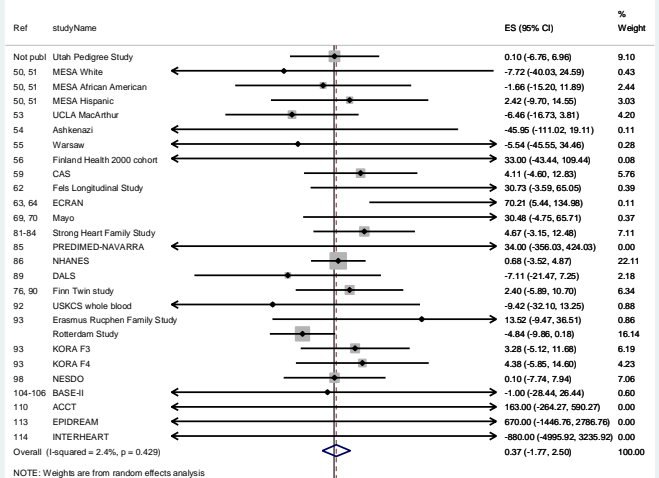

# Relative telomere length (T/S ratio): Women - white

All together - Women - white

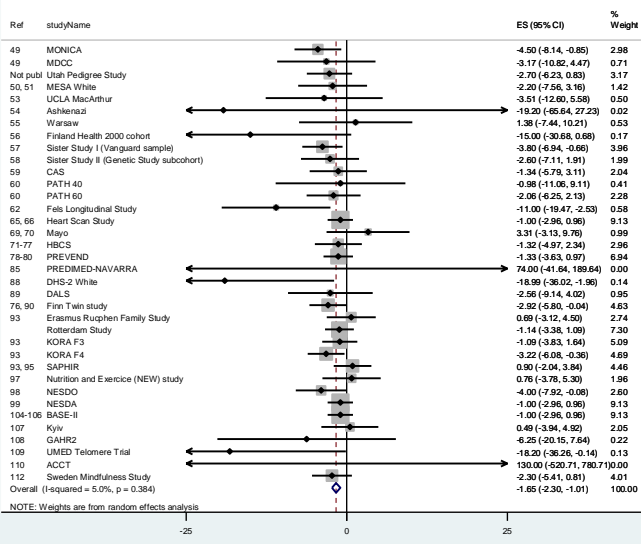

Young - Women - white

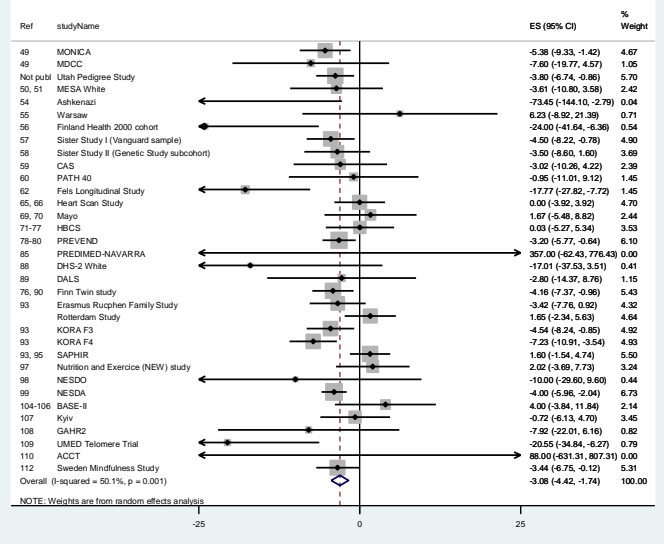

Middle - Women - white

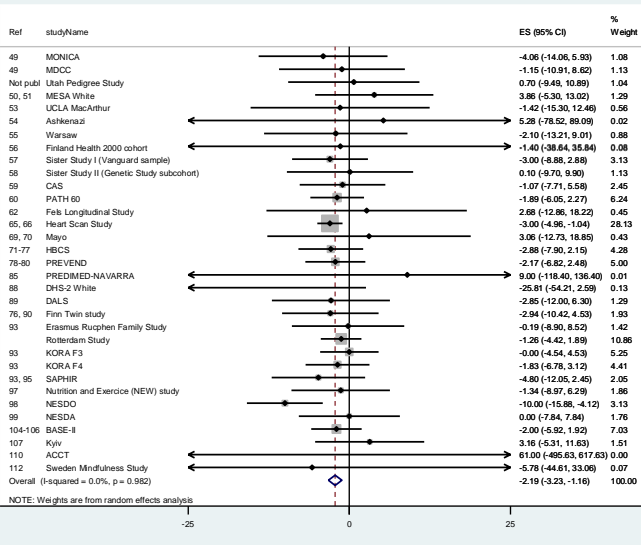

Old - Women - white

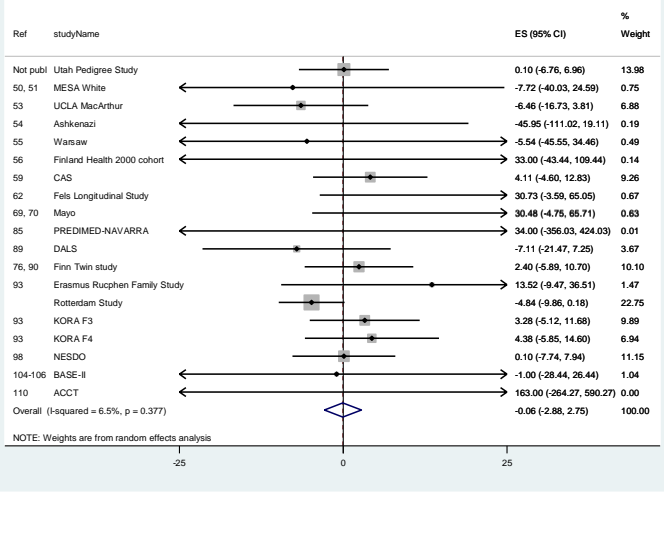

## Relative telomere length (T/S ratio): Women – African American

All together - Women - African American

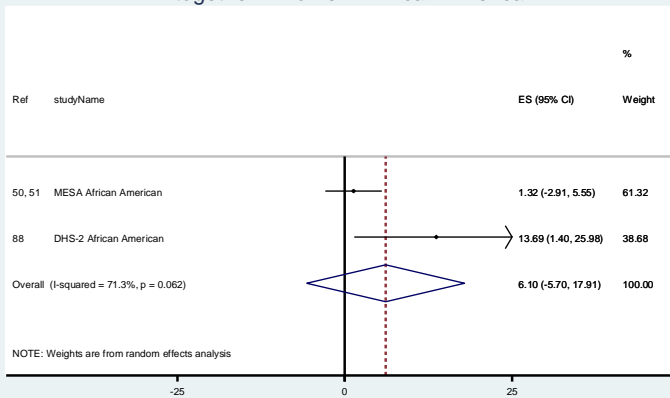

Young - Women - African American

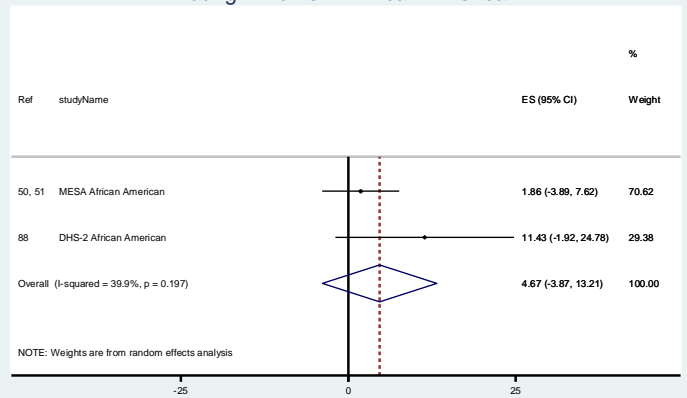

Middle - Women - African American

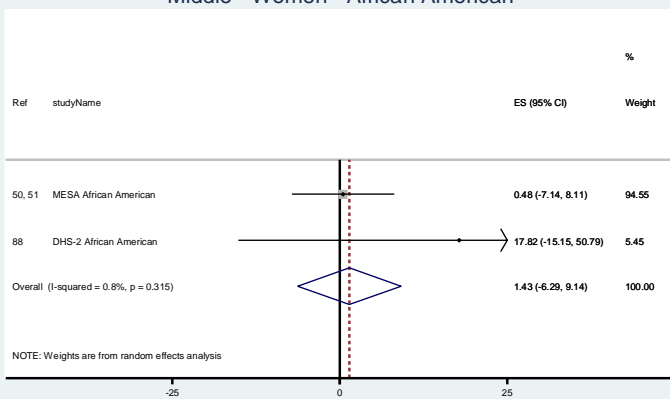

Old - Women - African American

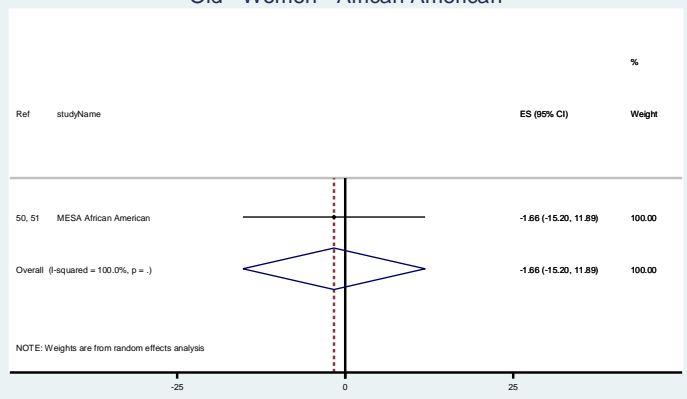

# Relative telomere length (T/S ratio): Women - Hispanic

All together - Women - Hispanic

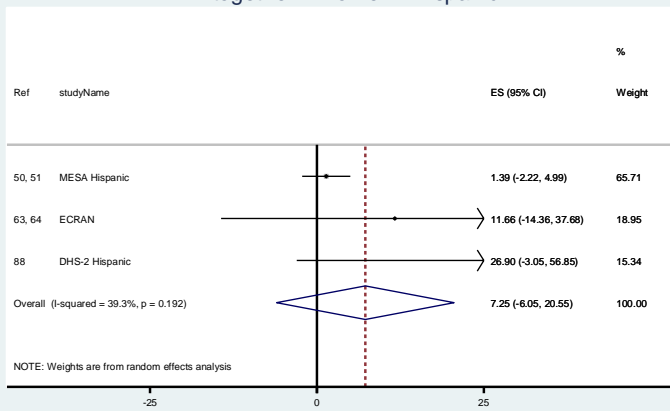

Young - Women - Hispanic

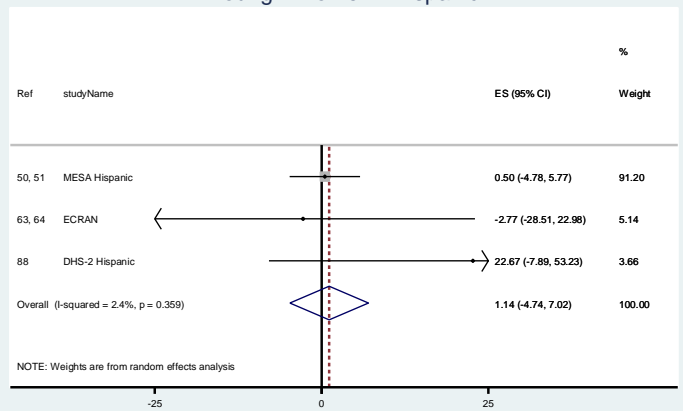

Middle - Women - Hispanic

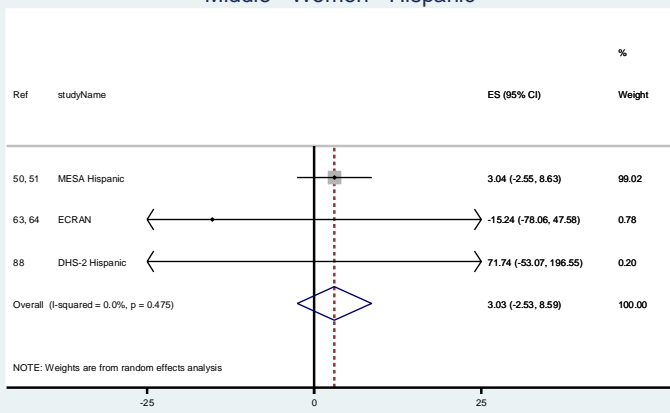

Old - Women - Hispanic

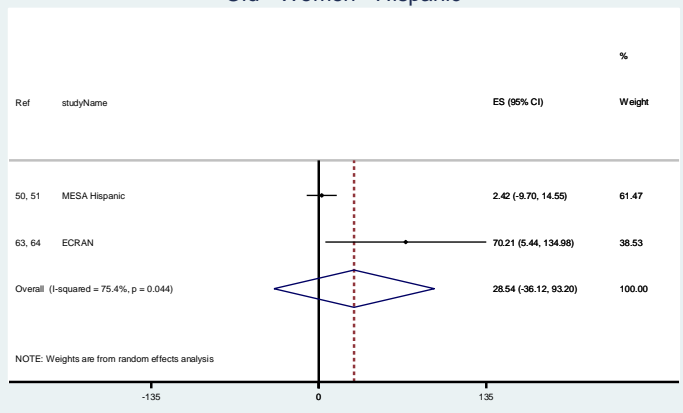

## Relative telomere length (T/S ratio): Women - Asian

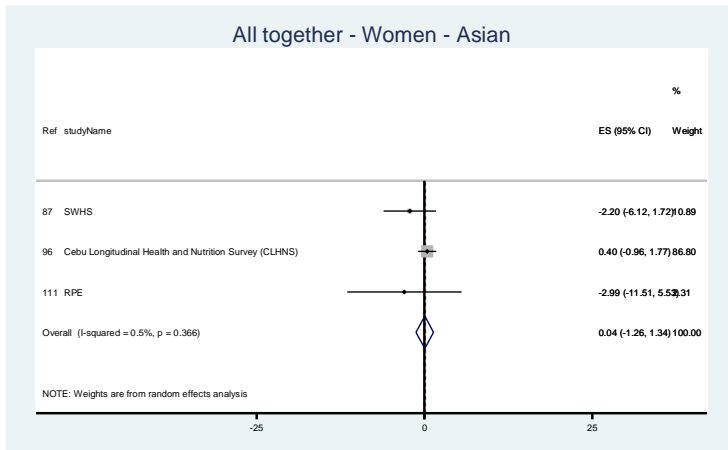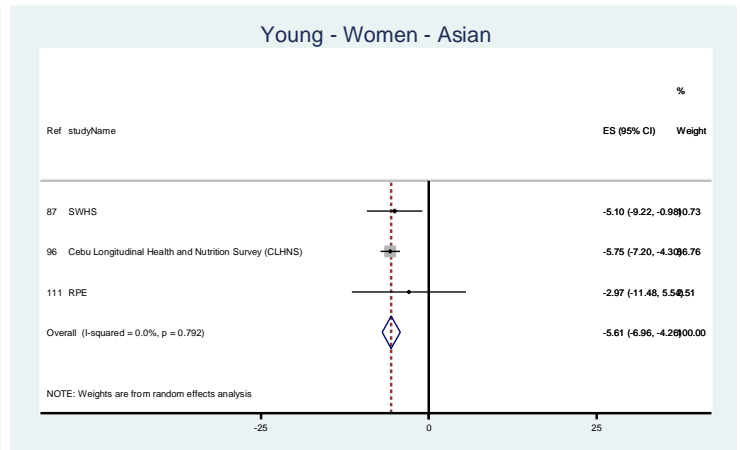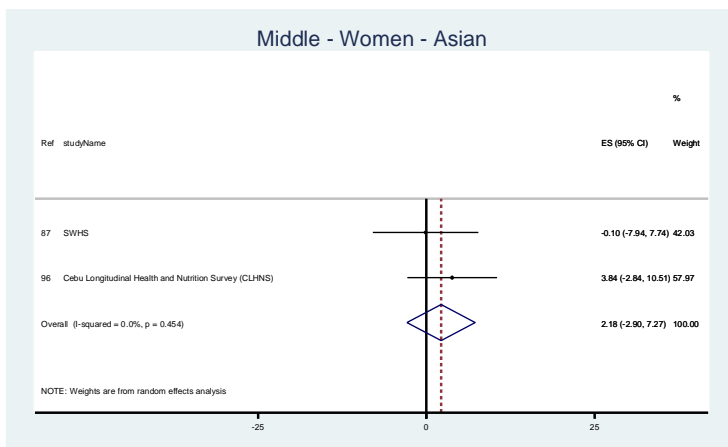

## Relative telomere length (T/S ratio): Women – Native American

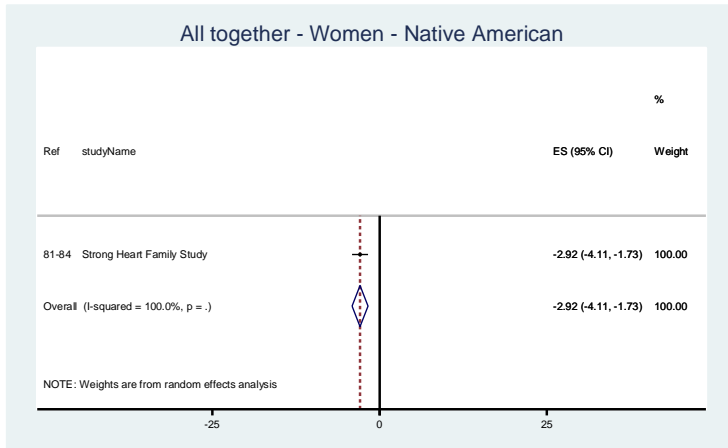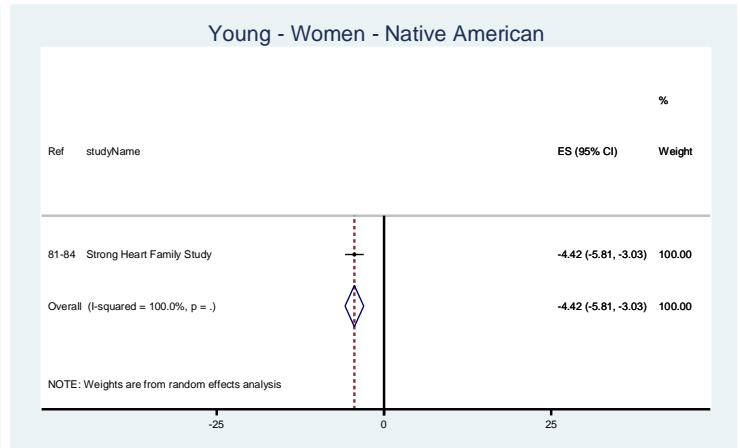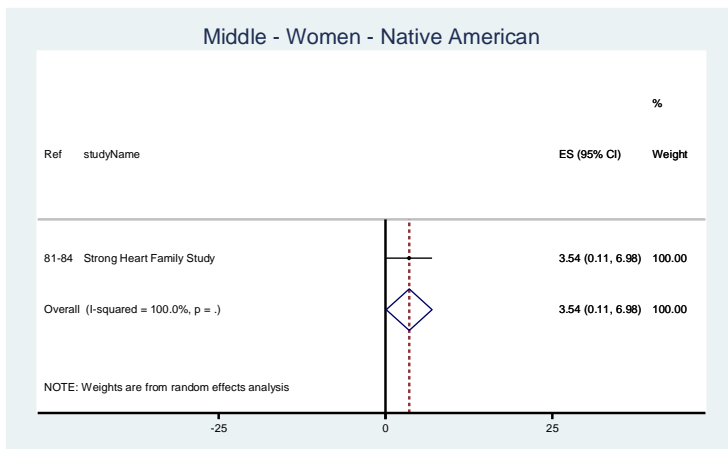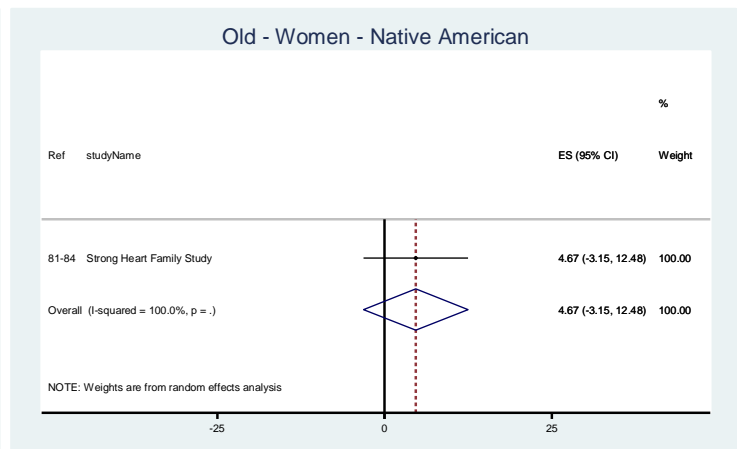

## Online Supporting Material

### REFERENCE NUMBERS OF THE SUPPLEMENTAL FOREST PLOTS

1. Aviv A, Valdes A, Gardner JP, Swaminathan R, Kimura M, Spector TD. Menopause modifies the association of leukocyte telomere length with insulin resistance and inflammation. *J Clin Endocrinol Metab.* 2006;91:635-40.
2. Valdes AM, Andrew T, Gardner JP, Kimura M, Oelsner E, Cherkas LF, Aviv A, Spector TD. Obesity, cigarette smoking, and telomere length in women. *Lancet.* 2005;366:662-4.
3. Valdes AM, Richards JB, Gardner JP, Swaminathan R, Kimura M, Xiaobin L, Aviv A, Spector TD. Telomere length in leukocytes correlates with bone mineral density and is shorter in women with osteoporosis. *Osteoporos Int.* 2007;18:1203-10.
4. Cherkas LF, Hunkin JL, Kato BS, Richards JB, Gardner JP, Surdulescu GL, Kimura M, Lu X, Spector TD, Aviv A. The association between physical activity in leisure time and leukocyte telomere length. *Arch Intern Med.* 2008;168:154-8.
5. Richards JB, Valdes AM, Gardner JP, Kato BS, Siva A, Kimura M, Lu X, Brown MJ, Aviv A, Spector TD. Homocysteine levels and leukocyte telomere length. *Atherosclerosis.* 2008;200:271-7.
6. Chen W, Gardner JP, Kimura M, Brimacombe M, Cao X, Srinivasan SR, Berenson GS, Aviv A. Leukocyte telomere length is associated with HDL cholesterol levels: The Bogalusa heart study. *Atherosclerosis.* 2009;205:620-5.
7. Aviv A, Chen W, Gardner JP, Kimura M, Brimacombe M, Cao X, Srinivasan SR, Berenson GS. Leukocyte telomere dynamics: longitudinal findings among young adults in the Bogalusa Heart Study. *Am J Epidemiol.* 2009;169:323-9.
8. Hunt SC, Chen W, Gardner JP, Kimura M, Srinivasan SR, Eckfeldt JH, Berenson GS, Aviv A. Leukocyte telomeres are longer in African Americans than in whites: the National Heart, Lung, and Blood Institute Family Heart Study and the Bogalusa Heart Study. *Aging Cell.* 2008;7:451-8.
9. Gardner JP, Li S, Srinivasan SR, Chen W, Kimura M, Lu X, Berenson GS, Aviv A. Rise in insulin resistance is associated with escalated telomere attrition. *Circulation.* 2005;111:2171-7.
10. Adaikalakoteswari A, Balasubramanyam M, Mohan V. Telomere shortening occurs in Asian Indian Type 2 diabetic patients. *Diabet Med.* 2005;22:1151-6.
11. Barbieri M, Paolisso G, Kimura M, Gardner JP, Boccardi V, Papa M, Hjelmborg JV, Christensen K, Brimacombe M, Nawrot TS, et al. Higher circulating levels of IGF-1 are associated with longer leukocyte telomere length in healthy subjects. *Mech Ageing Dev.* 2009;130:771-6.
12. De Meyer T, Rietzschel ER, De Buyzere ML, Langlois MR, De Bacquer D, Segers P, Van Damme P, De Backer GG, Van Oostveldt P, Van Criekinge W, et al. Systemic telomere length and preclinical atherosclerosis: the Asklepios Study. *Eur Heart J.* 2009;30:3074-81.
13. Bekaert S, De Meyer T, Rietzschel ER, De Buyzere ML, De Bacquer D, Langlois M, Segers P, Cooman L, Van Damme P, Cassiman P, et al. Telomere length and cardiovascular risk factors in a middle-aged population free of overt cardiovascular disease. *Aging Cell.* 2007;6:639-47.
14. Rietzschel ER, De Buyzere ML, Bekaert S, Segers P, De Bacquer D, Cooman L, Van Damme P, Cassiman P, Langlois M, van Oostveldt P, et al. Rationale, design, methods and baseline characteristics of the Asklepios Study. *Eur J Cardiovasc Prev Rehabil.* 2007;14:179-91.
15. De Meyer T, Rietzschel ER, De Buyzere ML, De Bacquer D, Van Criekinge W, De Backer GG, Gillebert TC, Van Oostveldt P, Bekaert S. Paternal age at birth is an important determinant of offspring telomere length. *Hum Mol Genet.* 2007;16:3097-102.
16. Demissie S, Levy D, Benjamin EJ, Cupples LA, Gardner JP, Herbert A, Kimura M, Larson MG, Meigs JB, Keane JF, et al. Insulin resistance, oxidative stress, hypertension, and leukocyte telomere length in men from the Framingham Heart Study. *Aging Cell.* 2006;5:325-30.
17. O'Donnell CJ, Demissie S, Kimura M, Levy D, Gardner JP, White C, D'Agostino RB, Wolf PA, Polak J, Cupples LA, et al. Leukocyte telomere length and carotid artery intimal medial thickness: the Framingham Heart Study. *Arterioscler Thromb Vasc Biol.* 2008;28:1165-71.
18. Vasan RS, Demissie S, Kimura M, Cupples LA, White C, Gardner JP, Cao X, Levy D, Benjamin EJ, Aviv A. Association of leukocyte telomere length with echocardiographic left ventricular mass: the Framingham heart study. *Circulation.* 2009;120:1195-202.
19. Houben JM, Mercken EM, Ketelslegers HB, Bast A, Wouters EF, Hageman GJ, Schols AM. Telomere shortening in chronic obstructive pulmonary disease. *Respir Med.* 2009;103:230-6.
20. Rius-Ottenheim N, Houben JM, Kromhout D, Kafatos A, van der Mast RC, Zitman FG, Geleijnse JM, Hageman GJ, Giltay EJ. Telomere length and mental well-being in elderly men from the Netherlands and Greece. *Behav Genet.* 2012;42:278-86.

## Online Supporting Material

21. Houben JM, Giltay EJ, Rius-Ottenheim N, Hageman GJ, Kromhout D. Telomere length and mortality in elderly men: the Zutphen Elderly Study. *J Gerontol A Biol Sci Med Sci*. 2011;66:38-44.
22. Jeanclos E, Schork NJ, Kyvik KO, Kimura M, Skurnick JH, Aviv A. Telomere length inversely correlates with pulse pressure and is highly familial. *Hypertension*. 2000;36:195-200.
23. Hjelmborg JV, Nzietchueng R, Kimura M, Gardner JP, Bladbjerg EM, Christensen K, Aviv A, Benetos A. Leukocyte telomere length is inversely correlated with plasma Von Willebrand factor. *Thromb Res*. 2010;125:e339-42.
24. Farzaneh-Far R, Lin J, Epel E, Lapham K, Blackburn E, Whooley MA. Telomere length trajectory and its determinants in persons with coronary artery disease: longitudinal findings from the heart and soul study. *PLoS One*. 2010;5:e8612.
25. Farzaneh-Far R, Lin J, Epel ES, Harris WS, Blackburn EH, Whooley MA. Association of marine omega-3 fatty acid levels with telomeric aging in patients with coronary heart disease. *JAMA*. 2010;303:250-7.
26. Deary IJ, Gow AJ, Taylor MD, Corley J, Brett C, Wilson V, Campbell H, Whalley LJ, Visscher PM, Porteous DJ, et al. The Lothian Birth Cohort 1936: a study to examine influences on cognitive ageing from age 11 to age 70 and beyond. *BMC Geriatr*. 2007;7:28.
27. Harris SE, Martin-Ruiz C, von Zglinicki T, Starr JM, Deary IJ. Telomere length and aging biomarkers in 70-year-olds: the Lothian Birth Cohort 1936. *Neurobiol Aging*. 2012;33:1486 e3-8.
28. Huda N, Tanaka H, Herbert BS, Reed T, Gilley D. Shared environmental factors associated with telomere length maintenance in elderly male twins. *Aging Cell*. 2007;6:709-13.
29. Fitzpatrick AL, Reed T, Goldberg J, Buchwald D. The association between prolonged fatigue and cardiovascular disease in World War II veteran twins. *Twin Res*. 2004;7:571-7.
30. Kark JD, Goldberger N, Kimura M, Sinnreich R, Aviv A. Energy intake and leukocyte telomere length in young adults. *Am J Clin Nutr*. 2012;95:479-87.
31. Kark JD, Nassar H, Shaham D, Sinnreich R, Goldberger N, Aboudi V, Bogot NR, Kimura M, Aviv A. Leukocyte telomere length and coronary artery calcification in Palestinians. *Atherosclerosis*. 2013;229:363-8.
32. Strandberg TE, Saijonmaa O, Fyhrquist F, Tilvis RS, Strandberg AY, Miettinen TA, Pitkala KH, Salomaa V. Telomere length in old age and cholesterol across the life course. *J Am Geriatr Soc*. 2011;59:1979-81.
33. Strandberg TE, Kovanen PT, Eklund KK. Is the "lipid paradox" in rheumatoid arthritis really a paradox? Comment on the article by Bartels et al. *Arthritis Rheum*. 2011;63:3644-5; author's reply 5-6.
34. Strandberg TE, Saijonmaa O, Tilvis RS, Pitkala KH, Strandberg AY, Miettinen TA, Fyhrquist F. Association of telomere length in older men with mortality and midlife body mass index and smoking. *J Gerontol A Biol Sci Med Sci*. 2011;66:815-20.
35. Rode L, Nordestgaard BG, Weischer M, Bojesen SE. Increased body mass index, elevated C-reactive protein, and short telomere length. *J Clin Endocrinol Metab*. 2014;jc20141161.
36. Skamra C, Romero-Diaz J, Sandhu A, Huang Q, Lee J, Pearce W, McPherson DD, Sutton-Tyrrell K, Pope R, Ramsey-Goldman R. Telomere length in patients with systemic lupus erythematosus and its associations with carotid plaque. *Rheumatology*. 2013;52:1101-8.
37. Zannolli R, Mohn A, Buoni S, Pietrobelli A, Messina M, Chiarelli F, Miracco C. Telomere length and obesity. *Acta Paediatr*. 2008;97:952-4.
38. Iglesias Molli AE, Panero J, Dos Santos PC, Gonzalez CD, Vilarino J, Sereday M, Cerrone GE, Slavutsky I, Frechtel GD. Metabolically healthy obese women have longer telomere length than obese women with metabolic syndrome. *PLoS One*. 2017;12:e0174945.
39. Xue HM, Liu QQ, Tian G, Quan LM, Zhao Y, Cheng G. Television Watching and Telomere Length Among Adults in Southwest China. *Am J Public Health*. 2017;107:1425-32.
40. Diaz VA, Mainous AG, 3rd, Everett CJ, Schoepf UJ, Codd V, Samani NJ. Effect of healthy lifestyle behaviors on the association between leukocyte telomere length and coronary artery calcium. *Am J Cardiol*. 2010;106:659-63.
41. Mainous AG, 3rd, Codd V, Diaz VA, Schoepf UJ, Everett CJ, Player MS, Samani NJ. Leukocyte telomere length and coronary artery calcification. *Atherosclerosis*. 2010;210:262-7.
42. Mainous AG, 3rd, Everett CJ, Diaz VA, Baker R, Mangino M, Codd V, Samani NJ. Leukocyte telomere length and marital status among middle-aged adults. *Age and ageing*. 2011;40:73-8.
43. Diaz VA, Mainous AG, Player MS, Everett CJ. Telomere length and adiposity in a racially diverse sample. *International journal of obesity*. 2010;34:261-5.
44. Willeit P, Willeit J, Mayr A, Weger S, Oberhollenzer F, Brandstatter A, Kronenberg F, Kiechl S. Telomere length and risk of incident cancer and cancer mortality. *JAMA*. 2010;304:69-75.



## Online Supporting Material

45. Willeit P, Willeit J, Brandstatter A, Ehrlenbach S, Mayr A, Gasperi A, Weger S, Oberhollenzer F, Reindl M, Kronenberg F, et al. Cellular aging reflected by leukocyte telomere length predicts advanced atherosclerosis and cardiovascular disease risk. *Arterioscler Thromb Vasc Biol.* 2010;30:1649-56.
46. Ehrlenbach S, Willeit P, Kiechl S, Willeit J, Reindl M, Schanda K, Kronenberg F, Brandstatter A. Influences on the reduction of relative telomere length over 10 years in the population-based Bruneck Study: introduction of a well-controlled high-throughput assay. *Int J Epidemiol.* 2009;38:1725-34.
47. Zheng YL, Ambrosone C, Byrne C, Davis W, Nesline M, McCann SE. Telomere length in blood cells and breast cancer risk: investigations in two case-control studies. *Breast Cancer Res Treat.* 2010;120:769-75.
48. Muezzinler A, Zaineddin AK, Brenner H. Body mass index and leukocyte telomere length in adults: a systematic review and meta-analysis. *Obesity reviews : an official journal of the International Association for the Study of Obesity.* 2014;15:192-201.
49. Nordfjall K, Eliasson M, Stegmayr B, Melander O, Nilsson P, Roos G. Telomere length is associated with obesity parameters but with a gender difference. *Obesity (Silver Spring).* 2008;16:2682-9.
50. Nettleton JA, Diez-Roux A, Jenny NS, Fitzpatrick AL, Jacobs DR, Jr. Dietary patterns, food groups, and telomere length in the Multi-Ethnic Study of Atherosclerosis (MESA). *Am J Clin Nutr.* 2008;88:1405-12.
51. Roux AV, Ranjit N, Jenny NS, Shea S, Cushman M, Fitzpatrick A, Seeman T. Race/ethnicity and telomere length in the Multi-Ethnic Study of Atherosclerosis. *Aging Cell.* 2009;8:251-7.
52. Salpea KD, Nicaud V, Tiret L, Talmud PJ, Humphries SE. The association of telomere length with paternal history of premature myocardial infarction in the European Atherosclerosis Research Study II. *J Mol Med (Berl).* 2008;86:815-24.
53. Puterman E, Lin J, Blackburn E, O'Donovan A, Adler N, Epel E. The power of exercise: buffering the effect of chronic stress on telomere length. *PLoS One.* 2010;5:e10837.
54. Atzmon G, Cho M, Cawthon RM, Budagov T, Katz M, Yang X, Siegel G, Bergman A, Huffman DM, Schechter CB, et al. Evolution in health and medicine Sackler colloquium: Genetic variation in human telomerase is associated with telomere length in Ashkenazi centenarians. *Proc Natl Acad Sci U S A.* 2010;107 Suppl 1:1710-7.
55. Hou L, Savage SA, Blaser MJ, Perez-Perez G, Hoxha M, Dioni L, Pegoraro V, Dong LM, Zatonski W, Lissowska J, et al. Telomere length in peripheral leukocyte DNA and gastric cancer risk. *Cancer Epidemiol Biomarkers Prev.* 2009;18:3103-9.
56. Kananen L, Surakka I, Pirkola S, Suvisaari J, Lonqvist J, Peltonen L, Ripatti S, Hovatta I. Childhood adversities are associated with shorter telomere length at adult age both in individuals with an anxiety disorder and controls. *PLoS One.* 2010;5:e10826.
57. Kim S, Parks CG, DeRoo LA, Chen H, Taylor JA, Cawthon RM, Sandler DP. Obesity and weight gain in adulthood and telomere length. *Cancer Epidemiol Biomarkers Prev.* 2009;18:816-20.
58. Kim S, Sandler DP, Carswell G, De Roo LA, Parks CG, Cawthon R, Weinberg CR, Taylor JA. Telomere length in peripheral blood and breast cancer risk in a prospective case-cohort analysis: results from the Sister Study. *Cancer Causes Control.* 2011;22:1061-6.
59. Kurz DJ, Kloeckener-Gruissem B, Akhmedov A, Eberli FR, Buhler I, Berger W, Bertel O, Luscher TF. Degenerative aortic valve stenosis, but not coronary disease, is associated with shorter telomere length in the elderly. *Arterioscler Thromb Vasc Biol.* 2006;26:e114-7.
60. Mather KA, Jorm AF, Milburn PJ, Tan X, Easteal S, Christensen H. No associations between telomere length and age-sensitive indicators of physical function in mid and later life. *J Gerontol A Biol Sci Med Sci.* 2010;65:792-9.
61. Pavanello S, Hoxha M, Dioni L, Bertazzi PA, Snenghi R, Nalesso A, Ferrara SD, Montisci M, Baccarelli A. Shortened telomeres in individuals with abuse in alcohol consumption. *Int J Cancer.* 2011;129:983-92.
62. Lee M, Martin H, Firpo MA, Demerath EW. Inverse association between adiposity and telomere length: The Fels Longitudinal Study. *Am J Hum Biol.* 2011;23:100-6.
63. Barrera G, Cases T, Bunout D, de la Maza MP, Leiva L, Rodriguez JM, Hirsch S. Associations between socioeconomic status, aging and functionality among older women. *Geriatric nursing.* 2014.
64. Bunout D, Barrera G, de la Maza MP, Leiva L, Hirsch S. Effect of weight maintenance or gain in a 10 years period over telomere length, sirtuin 1 and 6 expression and carotid intima media thickness. *Journal of human nutrition and dietetics : the official journal of the British Dietetic Association.* 2014.
65. Jackowska M, Hamer M, Carvalho LA, Erusalimsky JD, Butcher L, Steptoe A. Short sleep duration is associated with shorter telomere length in healthy men: findings from the Whitehall II cohort study. *PLoS One.* 2012;7:e47292.

## Online Supporting Material

66. Zalli A, Carvalho LA, Lin J, Hamer M, Erusalimsky JD, Blackburn EH, Steptoe A. Shorter telomeres with high telomerase activity are associated with raised allostatic load and impoverished psychosocial resources. *Proc Natl Acad Sci U S A*. 2014;111:4519-24.
67. Wong JY, De Vivo I, Lin X, Christiani DC. Cumulative PM(2.5) exposure and telomere length in workers exposed to welding fumes. *Journal of toxicology and environmental health Part A*. 2014;77:441-55.
68. Wong JY, De Vivo I, Lin X, Grashow R, Cavallari J, Christiani DC. The association between global DNA methylation and telomere length in a longitudinal study of boilermakers. *Genetic epidemiology*. 2014;38:254-64.
69. Skinner HG, Gangnon RE, Litzelman K, Johnson RA, Chari ST, Petersen GM, Boardman LA. Telomere length and pancreatic cancer: a case-control study. *Cancer Epidemiol Biomarkers Prev*. 2012;21:2095-100.
70. Boardman LA, Litzelman K, Seo S, Johnson RA, Vanderboom RJ, Kimmel GW, Cunningham JM, Gangnon RE, Engelman CD, Riegert-Johnson DL, et al. The association of telomere length with colorectal cancer differs by the age of cancer onset. *Clinical and translational gastroenterology*. 2014;5:e52.
71. Savolainen K, Eriksson JG, Kajantie E, Lahti M, Raikonen K. The history of sleep apnea is associated with shorter leukocyte telomere length: the Helsinki Birth Cohort Study. *Sleep medicine*. 2014;15:209-12.
72. Savolainen K, Raikonen K, Kananen L, Kajantie E, Hovatta I, Lahti M, Lahti J, Pesonen AK, Heinonen K, Eriksson JG. History of mental disorders and leukocyte telomere length in late adulthood: the Helsinki Birth Cohort Study (HBCS). *J Psychiatr Res*. 2012;46:1346-53.
73. Savolainen K, Eriksson JG, Kajantie E, Lahti J, Raikonen K. Telomere length and hypothalamic-pituitary-adrenal axis response to stress in elderly adults. *Psychoneuroendocrinology*. 2015;53:179-84.
74. Savolainen K, Eriksson JG, Kajantie E, Pesonen AK, Raikonen K. Associations between the five-factor model of personality and leukocyte telomere length in elderly men and women: The Helsinki Birth Cohort Study (HBCS). *J Psychosom Res*. 2015.
75. Savolainen K, Eriksson JG, Kananen L, Kajantie E, Pesonen AK, Heinonen K, Raikonen K. Associations between early life stress, self-reported traumatic experiences across the lifespan and leukocyte telomere length in elderly adults. *Biological psychology*. 2014;97:35-42.
76. Kajantie E, Pietilainen KH, Wehkalampi K, Kananen L, Raikonen K, Rissanen A, Hovi P, Kaprio J, Andersson S, Eriksson JG, et al. No association between body size at birth and leucocyte telomere length in adult life--evidence from three cohort studies. *Int J Epidemiol*. 2012;41:1400-8.
77. Tiainen AM, Mannisto S, Blomstedt PA, Moltchanova E, Perala MM, Kaartinen NE, Kajantie E, Kananen L, Hovatta I, Eriksson JG. Leukocyte telomere length and its relation to food and nutrient intake in an elderly population. *European journal of clinical nutrition*. 2012;66:1290-4.
78. Hoen PW, Rosmalen JG, Schoevers RA, Huzen J, van der Harst P, de Jonge P. Association between anxiety but not depressive disorders and leukocyte telomere length after 2 years of follow-up in a population-based sample. *Psychological medicine*. 2013;43:689-97.
79. Huzen J, Wong LS, van Veldhuisen DJ, Samani NJ, Zwinderman AH, Codd V, Cawthon RM, Benus GF, van der Horst IC, Navis G, et al. Telomere length loss due to smoking and metabolic traits. *Journal of internal medicine*. 2014;275:155-63.
80. Kingma EM, de Jonge P, van der Harst P, Ormel J, Rosmalen JG. The association between intelligence and telomere length: a longitudinal population based study. *PLoS One*. 2012;7:e49356.
81. Zhu Y, Voruganti VS, Lin J, Matsuguchi T, Blackburn E, Best LG, Lee ET, MacCluer JW, Cole SA, Zhao J. QTL mapping of leukocyte telomere length in American Indians: the Strong Heart Family Study. *Aging*. 2013;5:704-16.
82. Zhao J, Zhu Y, Lin J, Matsuguchi T, Blackburn E, Zhang Y, Cole SA, Best LG, Lee ET, Howard BV. Short leukocyte telomere length predicts risk of diabetes in american indians: the strong heart family study. *Diabetes*. 2014;63:354-62.
83. Chen S, Lin J, Matsuguchi T, Blackburn E, Yeh F, Best LG, Devereux RB, Lee ET, Howard BV, Roman MJ, et al. Short leukocyte telomere length predicts incidence and progression of carotid atherosclerosis in American Indians: the Strong Heart Family Study. *Aging*. 2014;6:414-27.
84. Chen S, Yeh F, Lin J, Matsuguchi T, Blackburn E, Lee ET, Howard BV, Zhao J. Short leukocyte telomere length is associated with obesity in American Indians: The strong heart family study. *Aging*. 2014;6:380-9.
85. Garcia-Calzon S, Gea A, Razquin C, Corella D, Lamuela-Raventos RM, Martinez JA, Martinez-Gonzalez MA, Zalba G, Marti A. Longitudinal association of telomere length and obesity indices in an intervention study with a Mediterranean diet: the PREDIMED-NAVARRA trial. *International journal of obesity*. 2014;38:177-82.

## Online Supporting Material

86. Needham BL, Adler N, Gregorich S, Rehkopf D, Lin J, Blackburn EH, Epel ES. Socioeconomic status, health behavior, and leukocyte telomere length in the National Health and Nutrition Examination Survey, 1999-2002. *Social science & medicine*. 2013;85:1-8.
87. Cui Y, Cai Q, Qu S, Chow WH, Wen W, Xiang YB, Wu J, Rothman N, Yang G, Shu XO, et al. Association of leukocyte telomere length with colorectal cancer risk: nested case-control findings from the Shanghai Women's Health Study. *Cancer Epidemiol Biomarkers Prev*. 2012;21:1807-13.
88. Kozlitina J, Garcia CK. Red blood cell size is inversely associated with leukocyte telomere length in a large multi-ethnic population. *PLoS One*. 2012;7:e51046.
89. Pellatt AJ, Wolff RK, Lundgreen A, Cawthon R, Slattery ML. Genetic and lifestyle influence on telomere length and subsequent risk of colon cancer in a case control study. *International journal of molecular epidemiology and genetics*. 2012;3:184-94.
90. Loukola A, Wedenoja J, Keskitalo-Vuokko K, Broms U, Korhonen T, Ripatti S, Sarin AP, Pitkaniemi J, He L, Hoppola A, et al. Genome-wide association study on detailed profiles of smoking behavior and nicotine dependence in a twin sample. *Molecular psychiatry*. 2014;19:615-24.
91. Laine MK, Eriksson JG, Kujala UM, Raj R, Kaprio J, Backmand HM, Peltonen M, Sarna S. Effect of intensive exercise in early adult life on telomere length in later life in men. *Journal of sports science & medicine*. 2015;14:239-45.
92. Hofmann JN, Baccarelli A, Schwartz K, Davis FG, Ruterbusch JJ, Hoxha M, McCarthy BJ, Savage SA, Wacholder S, Rothman N, et al. Risk of renal cell carcinoma in relation to blood telomere length in a population-based case-control study. *Br J Cancer*. 2011;105:1772-5.
93. Broer L, Raschenberger J, Deelen J, Mangino M, Codd V, Pietilainen KH, Albrecht E, Amin N, Beekman M, de Craen AJ, et al. Association of adiponectin and leptin with relative telomere length in seven independent cohorts including 11,448 participants. *European journal of epidemiology*. 2014;29:629-38.
94. Raschenberger J, Kollerits B, Hammerer-Lercher A, Rantner B, Stadler M, Haun M, Klein-Weigel P, Fraedrich G, Kronenberg F. The association of relative telomere length with symptomatic peripheral arterial disease: results from the CAVASIC study. *Atherosclerosis*. 2013;229:469-74.
95. Heid IM, Wagner SA, Gohlke H, Iglseder B, Mueller JC, Cip P, Ladumer G, Reiter R, Stadlmayr A, Mackevics V, et al. Genetic architecture of the APM1 gene and its influence on adiponectin plasma levels and parameters of the metabolic syndrome in 1,727 healthy Caucasians. *Diabetes*. 2006;55:375-84.
96. Eisenberg DT, Hayes MG, Kuzawa CW. Delayed paternal age of reproduction in humans is associated with longer telomeres across two generations of descendants. *Proc Natl Acad Sci U S A*. 2012;109:10251-6.
97. Mason C, Risques RA, Xiao L, Duggan CR, Imayama I, Campbell KL, Kong A, Foster-Schubert KE, Wang CY, Alfano CM, et al. Independent and combined effects of dietary weight loss and exercise on leukocyte telomere length in postmenopausal women. *Obesity (Silver Spring)*. 2013;21:E549-54.
98. Comijs HC, van Marwijk HW, van der Mast RC, Naarding P, Oude Voshaar RC, Beekman AT, Boshuisen M, Dekker J, Kok R, de Waal MW, et al. The Netherlands study of depression in older persons (NESDO); a prospective cohort study. *BMC Res Notes*. 2011;4:524.
99. Penninx BW, Beekman AT, Smit JH, Zitman FG, Nolen WA, Spinhoven P, Cuijpers P, De Jong PJ, Van Marwijk HW, Assendelft WJ, et al. The Netherlands Study of Depression and Anxiety (NESDA): rationale, objectives and methods. *Int J Methods Psychiatr Res*. 2008;17:121-40.
100. Miranda-Furtado CL, Ramos FK, Kogure GS, Santana-Lemos BA, Ferriani RA, Calado RT, Dos Reis RM. A Nonrandomized Trial of Progressive Resistance Training Intervention in Women With Polycystic Ovary Syndrome and Its Implications in Telomere Content. *Reprod Sci*. 2016;23:644-54.
101. Denham J, Nelson CP, O'Brien BJ, Nankervis SA, Denniff M, Harvey JT, Marques FZ, Codd V, Zukowska-Szczechowska E, Samani NJ, et al. Longer leukocyte telomeres are associated with ultra-endurance exercise independent of cardiovascular risk factors. *PLoS One*. 2013;8:e69377.
102. Chilton WL, Marques FZ, West J, Kannourakis G, Berzins SP, O'Brien BJ, Charchar FJ. Acute exercise leads to regulation of telomere-associated genes and microRNA expression in immune cells. *PLoS One*. 2014;9:e92088.
103. Bloomer LD, Nelson CP, Denniff M, Christofidou P, Debiec R, Thompson J, Zukowska-Szczechowska E, Samani NJ, Charchar FJ, Tomaszewski M. Coronary artery disease predisposing haplogroup I of the Y chromosome, aggression and sex steroids--genetic association analysis. *Atherosclerosis*. 2014;233:160-4.
104. Bertram L, Bockenhoff A, Demuth I, Duzel S, Eckardt R, Li SC, Lindenberger U, Pawelec G, Siedler T, Wagner GG, et al. Cohort profile: The Berlin Aging Study II (BASE-II). *Int J Epidemiol*. 2014;43:703-12.

## Online Supporting Material

105. Gerstorff D, Bertram L, Lindenberger U, Pawelec G, Demuth I, Steinhagen-Thiessen E, Wagner GG. Editorial. *Gerontology*. 2016;62:311-5.
106. Meyer A, Salewsky B, Buchmann N, Steinhagen-Thiessen E, Demuth I. Relative Leukocyte Telomere Length, Hematological Parameters and Anemia - Data from the Berlin Aging Study II (BASE-II). *Gerontology*. 2016;62:330-6.
107. Khalangot M, Krasnienkov D, Vaiserman A, Avilov I, Kovtun V, Okhrimenko N, Koliada A, Kravchenko V. Leukocyte telomere length is inversely associated with post-load but not with fasting plasma glucose levels. *Exp Biol Med (Maywood)*. 2017;242:700-8.
108. Starnino L, Busque L, Tardif JC, D'Antono B. Psychological Profiles in the Prediction of Leukocyte Telomere Length in Healthy Individuals. *PLoS One*. 2016;11:e0165482.
109. Kasielski M, Eusebio MO, Pietruczuk M, Nowak D. The relationship between peripheral blood mononuclear cells telomere length and diet - unexpected effect of red meat. *Nutr J*. 2016;15:68.
110. McDonnell BJ, Yasmin, Butcher L, Cockcroft JR, Wilkinson IB, Erusalimsky JD, McEnery CM. The age-dependent association between aortic pulse wave velocity and telomere length. *J Physiol*. 2017;595:1627-35.
111. Yim OS, Zhang X, Shalev I, Monakhov M, Zhong S, Hsu M, Chew SH, Lai PS, Ebstein RP. Delay discounting, genetic sensitivity, and leukocyte telomere length. *Proc Natl Acad Sci U S A*. 2016;113:2780-5.
112. Wang X, Sundquist K, Hedelius A, Palmer K, Memon AA, Sundquist J. Leukocyte telomere length and depression, anxiety and stress and adjustment disorders in primary health care patients. *BMC Psychiatry*. 2017;17:148.
113. Gerstein HC, Yusuf S, Holman R, Bosch J, Pogue J, Investigators DT. Rationale, design and recruitment characteristics of a large, simple international trial of diabetes prevention: the DREAM trial. *Diabetologia*. 2004;47:1519-27.
114. Yusuf S, Hawken S, Ounpuu S, Dans T, Avezum A, Lanas F, McQueen M, Budaj A, Pais P, Varigos J, et al. Effect of potentially modifiable risk factors associated with myocardial infarction in 52 countries (the INTERHEART study): case-control study. *Lancet*. 2004;364:937-52.

## STUDY PROTOCOL FOR PARTICIPATING PIs

**Version August 2014**

**Note. A third search is performed in January 2016 and a fourth search in November 2017.**

### TELOMAAS study

#### **Is BMI associated with shorter telomere length? A meta-analysis of observational studies**

Marij Gielen, Maurice P. Zeegers

#### **Background**

Shorter telomeres are associated with age-related diseases such as type 2 diabetes and cardiovascular disease. Obesity, in which oxidative stress and chronic inflammation plays a role, is a precursor for these diseases. Increased oxidative stress and chronic inflammation are also negatively associated with telomere length (TL). Although many studies have collected information on obesity and TL, few have published on the association between TL and obesity with conflicting results. To resolve whether BMI is truly associated with TL a meta-analysis is set up. We hypothesize that BMI is associated with shorter TL independent of age.

#### **Objectives**

Our main objective is to set-up a large scale powerful international study to conduct a comprehensive investigation into the effect of BMI on TL.

#### **Study design**

This will be a pooled analysis of data collected from observational studies which collected BMI and TL of adult individuals.

#### **Analysis**

Study specific age- and sex-adjusted betas will be combined using a random-effects pooling. Absolute TL (kilo base pairs; kbp) or relative TL (T/S ratio) is outcome measure and BMI (kg/m<sup>2</sup>; continuous) is independent variable.

As potential sources of heterogeneity at study level are considered: (1) general factors: ethnicity, (2) factors related to TL measurement: cell type in which telomere length is determined, the technique of telomere length measurement, storage of DNA and (3) factors related to BMI: self reported or measured. Additionally stratified analysis will be performed by sex and by three age categories (younger than 60 years; between 60 and 75 years; older than 75 years of age). This means that a total of 12 betas will be estimated. For a complete list of variables please see below.

Between study heterogeneity will be estimated by Q and  $I^2$  statistics. Potential sources of heterogeneity will be investigated by meta-regression analysis and via sensitivity analyses.

#### **Outcome measures**

The primary outcome will be a pooled estimation of the decrease in kbp TL or T/S ratio per unit BMI.

#### **Time-schedule**

By the end of this year we would like to present the first draft.

A first search has taken place in 2011.

A second search is performed in summer 2014.

To be included in the meta-analysis we need the summary statistics or raw data. See next page for information.

#### **Co-authorship**

Because of the long list of co-authors, we have decided to include 1 co-author per participating study. This co-author will represent the study group of the participating study and will be recorded as

## Online Supporting Material

“name co-author” on behalf of “name group”. In pubmed and on the CV this will be regarded as a regularly co-authorship for all members of the group. The names of the members of the study group will be published online.

### Betas (and standard errors (SE) and number of individuals (n))

|                                | Both | Male | Female |
|--------------------------------|------|------|--------|
| All                            | 1    | 2    | 3      |
| Age <= 60 years                | 4    | 5    | 6      |
| Age > 60 years and <= 75 years | 7    | 8    | 9      |
| Age > 75 years of age          | 10   | 11   | 12     |

X= BMI (kg/m<sup>2</sup>)  
 Y= TL (kbp) or T/S ratio if kbp is not available

Confounders:

Analysis 1: corrected for sex (male/female) and age (years)

Analyses 2 and 3: corrected for age (years)

Analysis 4, 7 and 10: corrected for sex (male/female)

If the design is a(n)

Case-control study: only raw data or summary statistics of the controls is needed.

Intervention study: only raw data or summary statistics at baseline of participants is needed.

### List of variables

If you prefer to send the raw data, please include the variables listed below.

If you prefer to send the summary statistics, please indicate how the variables mentioned below are collected in your study.

|                |                                                                                                                                           |                                                              |
|----------------|-------------------------------------------------------------------------------------------------------------------------------------------|--------------------------------------------------------------|
| TL             | Absolute TL length kilo base pairs kbp<br>T/S ratio if absolute TL length not available                                                   |                                                              |
| BMI            | kg/m <sup>2</sup>                                                                                                                         |                                                              |
| BMI report     | 0= measured; 1= self reported                                                                                                             |                                                              |
| Age continuous | years                                                                                                                                     |                                                              |
| Age categories | 0= <= 60 years<br>1= > 60 years and <= 75 years<br>2= above 75 years of age                                                               |                                                              |
| Sex            | 0= male<br>1= female                                                                                                                      |                                                              |
| Ethnicity      | Summary statistics:<br>Percentage White<br>Percentage Black<br>Percentage Asian<br>Percentage Hispanic                                    | Raw data:<br>0= White<br>1= Black<br>2= Asian<br>3= Hispanic |
| Cell type      | 0= Leucocytes/whole blood/buffy coat<br>1= PBMC (Peripheral Blood Mononuclear cells)<br>2= Lymphocytes<br>3= Granulocytes<br>4= Monocytes |                                                              |
| TL measure     | 0= Southern Blood RF<br>1= Real time PCR<br>2= Flow Fish<br>3=fluorescent<br>4= other                                                     |                                                              |

## Online Supporting Material

|          |                                                                                                 |
|----------|-------------------------------------------------------------------------------------------------|
| DNA      | 0= stored before TL measurement<br>1= not stored before TL measurement                          |
| Study ID | Please provide the name/acronym under which your study should be quoted in manuscript or table. |
